1 **Title:**

2 Long-term and low-level envelope C2V3 stimulation from highly diverse virus isolates leads to  
3 frequent development of broad and elite antibody neutralization in HIV-1 infected individuals

4

5 Francisco Martin<sup>1</sup>, José Maria Marcelino<sup>1,2</sup>, Claudia Palladino<sup>1</sup>, Inês Bárto<sup>1</sup>, Susana Tracana<sup>1</sup>,  
6 Inês Moranguinho<sup>1</sup>, Paloma Gonçalves<sup>1</sup>, Rita Mateus<sup>1</sup>, Rita Calado<sup>1</sup>, Pedro Borrego<sup>1</sup>, Thomas  
7 Leitner<sup>3</sup>, Sofia Clemente<sup>4</sup>, Nuno Taveira<sup>1,2#</sup>

8

9 <sup>1</sup>Research Institute for Medicines (iMed.Ulisboa), Faculty of Pharmacy, Universidade de Lisboa,  
10 Lisbon, Portugal; <sup>2</sup>Centro de Investigação Interdisciplinar Egas Moniz (CiiEM), Instituto  
11 Universitário Saúde Egas Moniz, Caparica, Portugal; <sup>3</sup>Theoretical Biology and Biophysics Group,  
12 Los Alamos National Laboratory, Los Alamos, NM 87545, USA; <sup>4</sup>Hospital da Divina Providência,  
13 Luanda, Angola.

14

15 **Running Head:** Antibody neutralization and HIV-1 evolution

16 # Address correspondence to:

17 Nuno Taveira

18 Research Institute for Medicines (iMed.Ulisboa),

19 Faculty of Pharmacy, Universidade de Lisboa

20 Av. Prof. Gama Pinto, 1649-003 Lisbon, Portugal

21 Email: [ntaveira@ff.ul.pt](mailto:ntaveira@ff.ul.pt)

22 **NOTE:** This preprint reports new research that has not been certified by peer review and should not be used to guide clinical practice.

23 **Abstract**

24 Elicitation of potent neutralizing antibodies against genetically diverse HIV-1 isolates is  
25 important for an effective HIV-1 vaccine. Some HIV-1 infected patients produce such broadly  
26 neutralizing antibodies (bNAbs). Identification of host and viral correlates of bNAb production  
27 may help develop the next generation of HIV-1 vaccines. We carried out the first detailed  
28 characterization of the neutralizing antibody response and identify viral and host factors  
29 associated with the development of bNAbs in HIV-1 infected patients from Angola, one of the  
30 oldest, more dynamic, and diverse HIV-1 epidemics in the world. Plasma samples from 322 HIV-  
31 1 infected patients were collected in 2001, 2009 and 2014. Phylogenetic analysis of C2V3C3  
32 envelope sequences identified a diverse array of subtypes including A1, A2, B, C, D, F1, G, H, J,  
33 untypable strains, and recombinant forms which prevailed over pure subtypes. Notably, 56% of  
34 the patients developed cross, broad, or elite neutralizing responses against a reference panel of  
35 tier 2 Env-pseudoviruses far exceeding results obtained elsewhere in the world. The frequency  
36 of elite neutralizers was higher in 2014, when patients were on ART and had low viremia, than  
37 in 2009 when patients were drug naïve. In drug naïve patients, broad neutralization was  
38 associated with subtype C infection, lower CD4+ T cell counts, higher age, or higher titer of  
39 C2V3C3-specific antibodies relative to patients that did not develop bNAbs. Neutralizing  
40 antibodies targeted the V3-glycan supersite in most patients but antibodies specific for the V2  
41 apex, the CD4 binding site, the gp41 membrane-proximal external region (MPER) and unknown  
42 epitopes were also found in some patients. V3 and C3 regions were significantly less variable  
43 and less subject to positive selection in elite neutralizers compared to weak or no neutralizers  
44 suggesting an active role of bNabs directed against these regions in controlling HIV-1 replication  
45 and diversification. Hence, development of broad and elite antibody neutralization against HIV-  
46 1 requires long-term and low-level envelope V3C3 stimulation from highly diverse subtype C  
47 isolates. These results have direct implications for the design of a new generation of HIV-1  
48 vaccines.

## 49 Introduction

50 The HIV-1 Env glycoprotein is highly immunogenic but, in general, the antibodies elicited by it  
51 during infection lack neutralizing breadth or potency against primary HIV-1 strains thus failing  
52 to inhibit viral replication in infected individuals<sup>1,2</sup>. In natural infection only 5% to 30% of adults  
53 develop broadly neutralizing antibodies (bNAbs) after several years of infection<sup>2, 3, 4, 5, 6, 7</sup> and  
54 these bNAbs have little impact in the control of the infection due to the continuous capacity of  
55 HIV-1 to diversify and escape these antibodies<sup>5,8,9</sup>. However, some recombinant human bNAbs  
56 suppress viral replication in HIV-1 infected individuals<sup>10, 11, 12, 13, 14, 15</sup>, prevent human infection by  
57 some HIV-1 strains<sup>16</sup>, and passive immunization in animal models can protect from infection  
58 and/or disease progression (reviewed in<sup>17</sup>). Therefore, bNAbs are promising tools to restrict  
59 HIV-1 transmission and control disease progression if they could be induced by vaccination.  
60 Unfortunately, so far, antibodies elicited by candidate immunogens and vaccines have shown a  
61 limited ability to neutralize heterologous primary HIV-1 strains<sup>8, 18, 19, 20, 21, 22, 23, 24</sup>.

62 bNAbs target five highly conserved epitopes in the HIV-1 envelope: the CD4 binding site (CD4bs);  
63 the V2 apex; V3 glycan supersite; gp41 MPER, and gp41/gp120 interface which includes the  
64 fusion peptide<sup>17, 25, 26</sup>. However, the mechanisms underlying the elicitation of such antibodies  
65 by B cell populations are still largely unknown<sup>27, 28, 29, 30</sup>. Guiding the immune system to elicit  
66 such bNAbs remains a major challenge due to the extremely complex antibody maturation  
67 pathways and high levels of somatic hypermutation required by HIV-1 specific antibodies to  
68 acquire neutralization breadth<sup>30, 31</sup>. An exception is the V3-glycan supersite bNAb lineage that  
69 does not require extensive antibody-affinity maturation<sup>32, 33</sup> allowing their development in early  
70 stages of infection<sup>34</sup>, and explaining their high prevalence in recently infected individuals<sup>3</sup>.  
71 Furthermore, V3-specific IgG binding and neutralizing responses in pregnant woman living with  
72 HIV-1 predict low risk of mother-to-child-transmission of the virus<sup>35</sup>. In HIV-2 infected  
73 individuals, the V3 loop is a dominant target of bNAbs such that V3 undergoes extensive

74 sequence, conformational and functional alterations to escape antibody neutralization <sup>36, 37, 38</sup>.

75 Such findings, together with the proved therapeutic value of V3-glycan supersite bNAbs <sup>12</sup>,

76 highlight this epitope as a key target for HIV vaccine design.

77 Understanding the mechanisms underlying the production of bNAbs against HIV-1 in some

78 individuals during natural infection is of crucial importance for the development of improved

79 immunogens and immunization strategies. Gray et al. <sup>39</sup> showed that patients infected with HIV-

80 1 clade C rarely produce antibodies binding to the 2F5 neutralizing epitope in gp41 suggesting a

81 correlation between HIV-1 subtype and neutralizing response. However, other studies found

82 limited to no impact of HIV-1 subtype in plasma neutralization, suggesting that HIV-1 group M

83 subtypes and neutralization response evolved independently <sup>5, 40, 41</sup>. More recently, in a large

84 longitudinal Sub-Saharan HIV primary infection cohort, cross-clade plasma neutralization was

85 strongly correlated with subtype C infection <sup>3</sup>. Additionally, Rusert et al. <sup>2</sup> found a strong

86 association between plasma neutralization specificity and HIV-1 subtype, with subtype B viruses

87 being more vulnerable to CD4-binding-site specific antibodies and non-B viruses being more

88 vulnerable to V2-glycan specific neutralizing antibodies. In this study, V3-glycan and MPER-

89 specific neutralizing responses were independent of viral subtype. The differences observed

90 between studies might be related with the different assay conditions used to assess neutralizing

91 activity, in particular with the selected indicator virus panel that should represent the global HIV-

92 1 diversity and be standardized to allow inter-study comparison <sup>42</sup>.

93 Considering that vaccine effectiveness will depend on the extent to which induced antibodies

94 will neutralize the global diversity of circulating HIV-1 variants, it is important to characterize

95 HIV-1 antibody responses in different epidemics and geographies. For example, we recently

96 showed that the frequency and level of antibody response to selected epitopes in the envelope

97 gp41 differ between HIV-1 infected patients from Germany, France, and Portugal which have

98 different subtype distribution <sup>43</sup>. In Switzerland, data analysis of the Swiss HIV Cohort reported

99 that ethnicity was associated with bnAb induction being black participants more prone to  
100 develop bNAb responses <sup>2</sup>.

101 The neutralizing antibody response of HIV-1 infected patients from Angola has never been  
102 evaluated. Angolan HIV-1 epidemic is peculiar, as it is driven by all subtypes, multiple circulatory  
103 recombinant forms (CRFs) and unique recombinant forms (URFs) <sup>44, 45, 46, 47</sup>. In addition, being a  
104 very old epidemic, highly divergent and ancestral forms of the different subtypes are often  
105 present <sup>45, 47, 48, 49</sup>. It has been suggested that the genetic complexity of the virus quasispecies  
106 present in HIV-1 individuals is directly related to the development of neutralization breadth  
107 regardless of infection duration (reviewed in <sup>50</sup>). This should be particularly evident in old  
108 epidemics such as the one of Angola. Hence, characterizing the antibody responses and HIV-1  
109 evolution in this population may provide new insights into the development and evolution of  
110 the neutralizing antibody response against HIV-1 and into vaccine design. Here, we carried out  
111 the first detailed characterization of the neutralizing antibody response against HIV-1 in Angola  
112 and identified viral and host factors associated with the neutralizing response.

113

## 114 **Materials and Methods**

### 115 **Study population and ethics statement**

116 This cross-sectional retrospective study included 322 HIV-1 infected adults. Plasma samples  
117 were collected in 2001, 2009 and 2014 at the Hospital da Divina Providência (HDP), a referral  
118 hospital in Luanda, the capital city of Angola. Eligible participants had ≥19 years of age, were not  
119 pregnant and had a serological diagnosis of HIV-1 [Determine HIV-1/2 (Abbott) and Uni-Gold  
120 Recombigen (Trinity Biotech) rapid tests]. Plasma viral load and number of CD4+ T cells were  
121 determined in a subset of patients using the Abbott Real Time HIV-1 assay (Abbott Laboratories)  
122 and the ABACUS 5 Junior Hematology analyser, respectively. The study was conducted according  
123 to the Declaration of Helsinki and was reviewed and approved by the National Ethics Committee

124 of Angola. The study was verbally explained to all the patients before obtaining their written  
125 consent.

## 126 **Cell lines**

127 TZM-bl and HEK-293T cell lines were obtained from the NIH AIDS Reagent Program  
128 (<https://www.niaid.nih.gov/research/nih-aids-reagent-program>). TZM-bl cells were engineered  
129 from HeLa cells that constitutively express CXCR4 to express large amounts of CD4, CCR5 and a  
130 firefly luciferase reporter gene under the control of the HIV-1 LTR<sup>51</sup>. Cells were cultured at 37°C,  
131 5% CO<sub>2</sub> using Dulbecco minimal essential medium (DMEM) supplemented with 10 % heat-  
132 inactivated fetal bovine serum and with 100 units/ml of penicillin and 100 µg/ml of  
133 streptomycin.

## 134 **Viral RNA extraction, PCR amplification, sequencing, and phylogenetic analysis**

135 Before viral RNA extraction, 1 ml of plasma was centrifuged at 35,000rpm (61,793g) for 1h at  
136 4°C to concentrate viral particles. Supernatant was stored at -80°C for other applications and  
137 pelleted material was resuspended with 560 µl of Buffer AVL+RNA carrier from the QIAmp® Viral  
138 RNA Mini Kit (Qiagen) and the manufacturer's protocol was followed. Reverse transcription was  
139 performed with NZY First-Strand cDNA Synthesis Kit (NZYtech, Portugal) and a 534bp fragment  
140 comprising the C2V3C3 *env* region was amplified by PCR using an in-house method described  
141 elsewhere<sup>47, 52</sup>. Sequencing of the C2V3C3 amplicons was performed with BigDye Terminator  
142 Cycle Sequencing Kit (Applied Biosystems). Sequences were aligned with reference strains  
143 collected from the Los Alamos HIV Sequence Database (<http://www.hiv.lanl.gov/>) using Muscle  
144 in MEGA version 6 software<sup>53</sup>. Maximum-likelihood (ML) phylogenetic analyses were performed  
145 using the best-fit model of nucleotide substitution as estimated by Modeltest v3.7 under the  
146 Akaike information criterion<sup>54</sup>. ML trees were inferred with PhyML 3.0<sup>55</sup>. Tree searching was  
147 done with nearest neighbour interchange and subtree pruning and regrafting. The reliability of  
148 the obtained topology was estimated with bootstrap with 500 replicates<sup>55</sup>.

149 Determination of coreceptor usage was made based on the V3 loop sequence using geno2pheno  
150 [coreceptor] webtool (<https://coreceptor.geno2pheno.org/>)<sup>56</sup>. False positive rates (FPR) were  
151 10% as recommended<sup>57</sup>.

152 Selective pressure was examined with the DATAMONKEY web-server  
153 (<https://www.datamonkey.org/>)<sup>58</sup>, after removing all positions containing gaps and missing  
154 data from the dataset. All estimations were performed using the MG94 codon substitution  
155 model crossed with the nucleotide substitution model GTR previously selected with Modeltest.  
156 Four different approaches were used to identify codons under selection: single-likelihood  
157 ancestor counting (SLAC), fixed-effects likelihood (FEL), internal fixed effects likelihood (IFEL)  
158 and relaxed-effects likelihood (REL) methods<sup>59</sup>. While SLAC, FEL and REL detect sites under  
159 selection at the external branches of the phylogenetic tree, IFEL identifies such sites only along  
160 the internal branches. To classify a site as positively or negatively selected the cut-off P-value  
161 was 10% for SLAC, FEL and IFEL. For REL, codons under selection were detected with a cut-off  
162 value for the Bayes factor of 50.

### 163 **Entropy and N-linked glycosylation analysis**

164 Potential N-linked glycosylation sites were identified using the N-Glycosite software<sup>60</sup>, and the  
165 entropy at each amino acid position was measured with Shannon's entropy-one and Shannon's  
166 entropy-two online tools, all available at the Los Alamos National Laboratory HIV sequence  
167 database (<http://www.hiv.lanl.gov/>).

### 168 **Production of C2V3C3 polypeptides and analysis of antibody reactivity**

169 Six 178 amino acids long polypeptides comprising part of C2, V3 and part of C3 envelope regions  
170 (position 212–390 in gp120 in HIV-1 HXB2) of HIV-1 isolates circulating in Angola (subtypes C,  
171 G, H, J, and CRF02\_AG) and Portugal (subtype B) were expressed in *Escherichia coli* and purified  
172 as described previously<sup>61</sup>. Briefly, a DNA fragment of 534 nucleotides comprising the C2, V3 and  
173 C3 coding regions (position 6858-7392 in HIV-1 HXB2) was amplified from plasmids containing

174 the full-length envelope gene using the primers described elsewhere and cloned into the  
175 bacterial expression vector pTrcHis (Invitrogen)<sup>61</sup>. Expression of C2V3C3 polypeptides in  
176 *Escherichia coli* strain TOP10 was induced with isopropyl- $\beta$ -D-thiogalactopyranoside (IPTG)  
177 according to the manufacturer's instructions, and protein purification was performed using  
178 Dynabeads<sup>®</sup> His-tag Isolation & Pulldown (Life Technologies). Bradford assay (Bio-Rad) was  
179 performed to determine protein concentration. Purified recombinant polypeptides were  
180 analysed by SDS-12% PAGE.

181 Antibody reactivity against these polypeptides was determined using an ELISA assay as  
182 described<sup>61</sup>. In brief, 96-wells ELISA plates were coated overnight at 4°C with 100  $\mu$ l of 0.05M  
183 bicarbonate-coating buffer (pH=9.4) containing 100 ng of the different C2V3C3 polypeptides.  
184 Plates were blocked with 2% gelatine in Tris-buffered saline (TBS) 1X for 1h at room  
185 temperature. Serial dilutions of plasma (1:100 to 1:3200) in primary antibody buffer (TBS 1X +  
186 0.05 % Tween 20 + 5 % blocking solution) were added to the wells and the plates were incubated  
187 for 2h at room temperature. Goat anti-human IgG conjugated to alkaline phosphatase, diluted  
188 1:2000 in the primary antibody buffer and 5% goat serum was added to the wells. Plates were  
189 washed between steps with TBSt (TBS 1X + 0.05 % Tween 20). Plates were developed by adding  
190 Sigma-fast p-nitrophenol phosphate diluted in deionized water. The plates were incubated for  
191 20 minutes at room temperature protected from light. Optical density (OD) was read at 405nm  
192 on a microplate reader. The clinical cut-off value of the assay was calculated as the mean OD  
193 value of HIV-seronegative samples plus two times the standard deviation (SD). Binding antibody  
194 titers were calculated as the highest plasma dilutions giving a positive reaction (OD / cut-off > 1).

#### 195 **Production of Env-pseudotyped viruses**

196 A reference panel of 12 tier 2 HIV-1 Env-pseudotyped viruses of subtypes C (n=3), A (n=1),  
197 CRF07\_BC (n=2), CRF01\_AE (n=2), B (n=2), G (n=1) and AC recombinant (n=1) were produced  
198 using the Global panel of HIV-1 Env clones<sup>42</sup>, obtained through the NIH AIDS reagent program.



199 Env-pseudotyped viruses were produced by transfection of Env-expressing plasmids in 293T  
200 cells using pSG3.1Δenv as backbone, in a 1:3 ratio using JetPRIME® DNA transfection reagent.  
201 Viral stocks were filtered through 0.45 μm pore size filters after 48 hours and stored at -80°C  
202 until use.

### 203 **Plasma neutralization assay**

204 Neutralization of the Env-pseudotyped viruses was assessed in TZM-bl cells using Tat-induced  
205 luciferase (Luc) reporter gene expression to quantify the reduction in virus infection as described  
206 previously <sup>62</sup>. Briefly, TZM-bl cells (10,000 cells/well) were seeded the day before the  
207 neutralization assay to allow adherence of the cells to the bottom of the wells. Heat inactivated  
208 plasma samples (56°C for 30 min) were incubated at 1:40 dilution in triplicate with the respective  
209 Env-pseudotyped virus for 1 hr at 37°C before transfer to TZM-bl cells. After 48 hours, percent  
210 neutralization was determined by calculating the difference in average relative light units (RLU)  
211 between test wells containing plasma samples and the wells containing the Env-pseudotyped  
212 virus from the indicator panel after the normalization of the results using the average RLU of cell  
213 control wells. Results were considered valid if the average RLU of virus wells was >10 times the  
214 average RLU of cell control wells. A virus pseudotyped with the envelope glycoprotein of  
215 vesicular stomatitis virus (VSV-G) was used as neutralization specificity control.

216 Neutralizing antibody titers were determined for a subset of plasma samples with known  
217 antibody profiles (n=64). In this case, 100 μL of 2-fold serial dilutions beginning at 1:40 were  
218 mixed with 100 μL of each virus (200 TCID<sub>50</sub>/well) and incubated for 1 h before adding to the  
219 cells. After 48 h, culture medium was removed from each well, and plates were analyzed for  
220 luciferase activity as described above. Wells with medium were used as background control, and  
221 virus-cell wells were included as infection control. Neutralizing titer (ID<sub>50</sub>) was defined as the  
222 highest dilution for which 50% neutralization was achieved.

223

## 224 **Neutralization score and plasma categorization**

225 To categorize the neutralizing activity of the Angolan samples in terms of potency and breadth  
226 we used a previously described scoring system <sup>2, 43, 63</sup>. A score of 0 was attributed when  
227 neutralizing activity against a given virus of the panel was less than 20%, a score of 1 when  
228 neutralization ranged between 20 and <50%, a score of 2 for 50 to <80% neutralization and a  
229 score of 3 for  $\geq 80\%$  neutralization. The overall neutralization score (NS) for a given plasma was  
230 obtained by adding the scores against the 12 Env-pseudoviruses of the panel and reflects  
231 neutralization potency and breadth. As a validated and worldwide accepted classification system  
232 to define neutralizing activity is lacking, for the purpose of the present study we classified  
233 plasmas with scores 25-36 as elite neutralizers, 18-24 as broad neutralizers, 6-17 as cross  
234 neutralizers and  $< 6$  as weak or no neutralizers. According to this classification a plasma sample  
235 from an elite neutralizer must neutralize  $\geq 9$  viruses of the panel with a neutralization potency  
236  $\geq 80\%$ .

## 237 **Prediction of bNAbs epitope specificities by clustering analysis**

238 The neutralizing antibody specificities were determined for a subset of patients exhibiting broad  
239 and elite neutralization capacity using clustering analysis with human bNAbs targeting the main  
240 neutralizing epitopes on the viral envelope and capable to neutralize at least half of the 12 Env-  
241 pseudotyped viruses of the panel, as described previously <sup>42</sup>. Neutralization heatmaps and  
242 clusters were computed via the online tool ClustVis using a predefined correlation clustering  
243 distance method (Pearson correlation subtracted from 1) based on the average distance of all  
244 possible pairs. ClustVis is a web tool for visualizing clustering of multivariate data (available at  
245 <https://biit.cs.ut.ee/clustvis/>) <sup>64</sup>.

## 246 **Statistical analysis**

247 Statistical analysis was performed with GraphPad Prism versions 5.01 or 9.0 (GraphPad Software  
248 Incorporated, San Diego, California, USA). The Mann-Whitney, Kruskal-Wallis or Fisher's exact

249 tests were used to compare differences between groups. The Spearman rank test was used to  
250 quantify the magnitude and direction of the correlation between antibody neutralization activity  
251 and plasma binding titers against C2V3C3- polypeptides, CD4+ T cell counts, viral subtype and  
252 age of patients. Hypothesis tests were two-tailed and P values <0.05 were considered significant.  
253 To test the potential correlation between neutralization score and genetic distance of the clinical  
254 samples to the neutralization panel viruses, we used amino acid sequences and Hamming  
255 distances that included gaps as characters because: 1) neutralization occurs on the amino acid  
256 level, 2) does not depend on the evolutionary path to a state-combination, and 3) indels may  
257 have significant effects on antibody binding. Genetic distances were calculated using DECIPHER  
258 <sup>65</sup>, regression analysis was performed using R version R-4.0.3 <sup>66</sup>, and visualization using  
259 ggplot2<sup>67</sup>.

260

## 261 **Results**

### 262 **Characterization of the study population and infecting HIV-1 isolates**

263 Overall, 375 plasma samples from 322 adult HIV-1 infected patients from three sampling years,  
264 2001 (n=106), 2009 (n=210) and 2014 (n=59), were included in this analysis. Epidemiological,  
265 clinical, demographic, and virological characterization of the patients is described in **Table S1**.  
266 The median age of the patients was 34 years and most (n=242, 64.5%) were women. The main  
267 route of transmission was heterosexual contact (n=304, 81.1%). There were no significant  
268 differences related to age and sex between sampling years. The median plasma viral load (VL)  
269 at the time of sampling was significantly higher in 2001 relative to 2009 (4.2-fold higher) and  
270 2014 (33.5-fold higher). The median number of CD4+ T cells in 2014 was 1.8-fold higher when  
271 compared to 2009 ( $p=0.0015$ ). The significantly lower VL and higher CD4+ T cell number in 2014  
272 is consistent with most patients being on cART which was not the case in 2001 and 2009.

273 Sequencing and phylogenetic analysis of the C2V3C3 Env region was completed successfully for  
274 206 patients from 2001 (n=96/106, 90.6%) and 2009 (n=110/210, 52.4%). The following  
275 subtypes were identified: A1 (2001, n=33, 34.4%; 2009, n=32, 29.1%), A2 (2001, n=6, 6.3%; 2009,  
276 n=3, 2.7%), B (2001, n=2, 2.1%; 2009, n=2, 1.8%), C (2001, n=12, 12.5%; 2009, n=30, 27.3%), D  
277 (2001, n=2, 2.1%; 2009, n=8, 7.3%), F1 (2001, n=5, 5.2%; 2009, n=6, 5.5%), G (2001, n=8, 8.3%;  
278 2009, n=11, 10%), H (2001, n=19, 19.8%; 2009, n=15, 13.6%), and J (2001, n=3, 3.1%; 2009, n=0,  
279 0.0%). Untypable U strains were 4.2% (n=6) in 2001 and 2.7% (n=3) in 2009 (**Figure S1**). Subtype  
280 A prevailed in 2001 and 2009, but subtype C increased significantly (2.2-fold,  $P=0.0095$ ) in 2009.  
281 Out of the 176 isolates for which there were protease (PR) and C2V3C3 sequences available, 74  
282 (42.0%) were non-recombinant and 102 (58.0%) were recombinant. Recombinant strains  
283 prevailed over pure subtypes in 2001 and 2009 (**Table S2**).

284 The genotypic analysis showed that most viruses were CCR5-tropic in 2001 (82.3%, N=79) and  
285 in 2009 (85.5%, N=94), without significant differences between sampling years (**Figure S2**).  
286 Unfortunately, we could not sequence the C2V3C3 region from most of the 2014 samples due  
287 to their low or undetectable viral load (**Table S1**). Moreover, the lack of plasma prevented  
288 further analysis in samples collected in 2001.

289

## 290 **Characterization of the antibody response**

291 A total of 236 plasma samples, 178 from 2009 and 58 from 2014, were screened for  
292 neutralization breadth and potency against the 12 Env-pseudotyped indicator panel, amounting  
293 to 2832 plasma/virus combinations (**Figure S3**). In 2009, 80.9% (144/178) of Angolan patients  
294 effectively neutralized at least one virus from the indicator panel; this increased to 93.1%  
295 (54/58) in 2014 (**Figure 1**). Likewise, the mean percent neutralization (27.43%, 95%CI: 25.94,  
296 28.92 in 2009 vs 60.52%, 95%CI: 57.37, 63.66 in 2014,  $p<0.0001$ ) and the mean neutralization

297 breadth (4.39, 95%CI: 3.83, 4.95 in 2009 vs 8.40, 95%CI: 7.32, 9.48 in 2014,  $p < 0.0001$ ) were  
298 higher in 2014 relative to 2009.

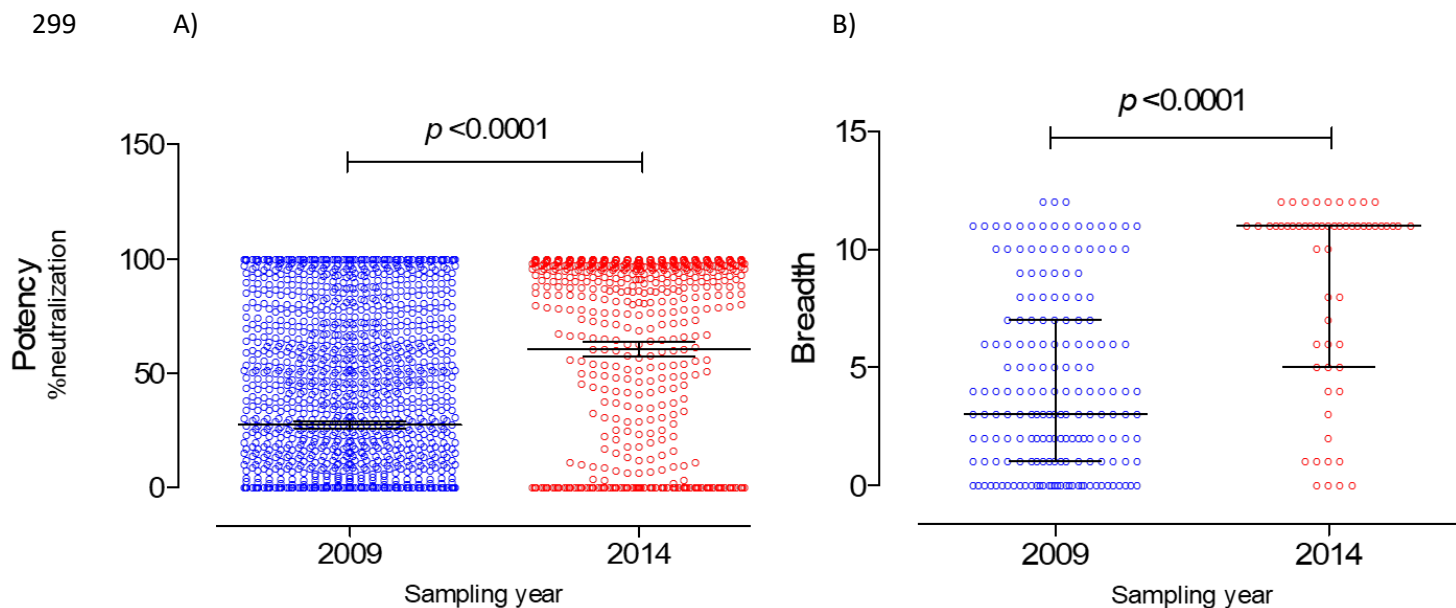

300

301 **Figure 1**– Neutralization potency and breadth per sampling year. A) Potency of neutralization (%  
302 neutralization at 1:40 plasma dilution) of samples collected in 2009 and 2014 as assessed against  
303 the 12-Env-pseudotyped virus indicator panel. Mean and 95% confidence intervals are shown.  
304 B) Neutralization breadth (number of Env-pseudotyped viruses neutralized >20%) in samples  
305 collected in 2009 and 2014. Median and interquartile range are shown P values were obtained  
306 using the Mann Whitney U test.

307

308 The percent neutralization for each plasma-virus combination was recorded as a breadth-  
309 potency matrix:  $\geq 80\%$  neutralization received a score of 3, 50% to  $< 80\%$  a score of 2, 20% to  
310  $< 50\%$  a score of 1, and  $< 20\%$  received a score of 0. Plasma samples were then ranked by the sum  
311 of scores in order to reflect their potency and breadth<sup>2,63</sup>. Breadth, potency, and neutralization  
312 score were directly correlated as expected (**Figure S4**).

313 Mean NS was 11.71, 95% CI [10.22, 13.19] ranging from 0 to 36 and median was 7, IQR [2.0,  
314 21.0]. Remarkably, approximately 30% (n= 68/236) of the patients developed antibody  
315 responses with the capacity to potently neutralize at least half the viruses from the panel (**Figure**  
316 **2A**). Overall, considering both sampling years, 18.6% (n= 44/236) of study participants were elite  
317 neutralizers (NS  $\geq$  25), 10.2% (n= 24/236) were broad neutralizers ( $18 \leq$  NS < 25), 27.1% (n=  
318 64/236) were cross neutralizers ( $6 \leq$  NS < 17), and 44.1% (n= 104/236) were weak neutralizers  
319 or did not neutralize any virus of the panel (**Figure 2B**).

320

### 321 **Correlates of the neutralizing response**

322 The neutralizing antibody response has been previously associated with viral load, CD4+ T cell  
323 count, viral diversity and infection time<sup>2,3</sup>. We first analyzed the impact of sample collection  
324 time on the neutralizing antibody responses of the HIV infected Angolan patients. Strikingly,  
325 median NS was 6.2-fold higher in 2014 relative to 2009 (31.00, IQR [10.50, 33.00] vs 5.00, IQR  
326 [1.00, 13.25],  $p < 0.0001$ ) (**Figure 2A**). Consistent with this, the frequency of elite neutralizers was  
327 9.5-fold higher in 2014 than in 2009 [57% (n=33/58) vs 6% (n= 11/178),  $p < 0.0001$ ], and weak or  
328 no neutralizers were 2.7-fold more frequent in 2009 than in 2014 [52% (n= 93/178) vs 19.0% (n=  
329 11/58),  $p < 0.0001$ ] (**Figure 2B**). Broad neutralizers were 2.4-fold more frequent in 2009 than in  
330 2014 [12% (n= 21/178) vs 5% (n= 3/58),  $p = 0.2107$ ] and a similar trend was observed for cross  
331 neutralizers [30% (n= 53/179) vs 19.0% (n= 11/58),  $p = 0.1270$ ]. We also analysed matching  
332 plasma pairs from 2009 and 2014 to determine the evolution of neutralizing antibody response  
333 as a function of infection time. In line with the previous results, neutralizing score increased in  
334 2014 relative to 2009 in 31 out of the 38 matched plasma pairs analysed (81.6%). (**Figure 2C**).  
335 The NS was unrelated with the sex of the patients (**Figure 2D**).

336 A)

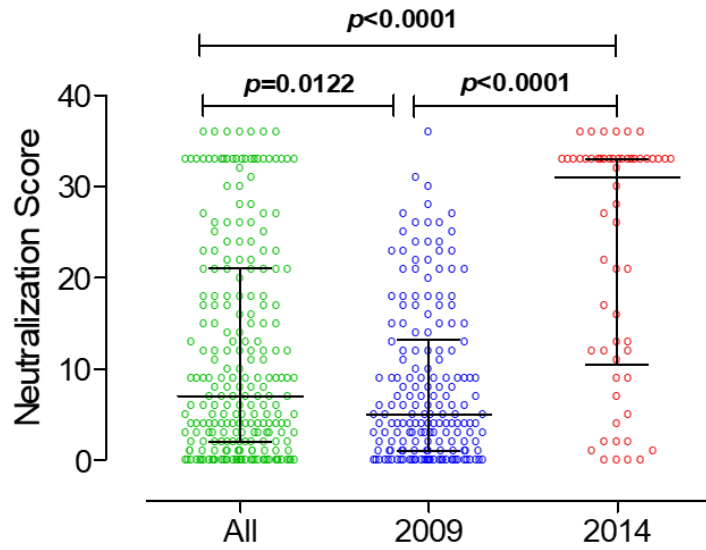

B)

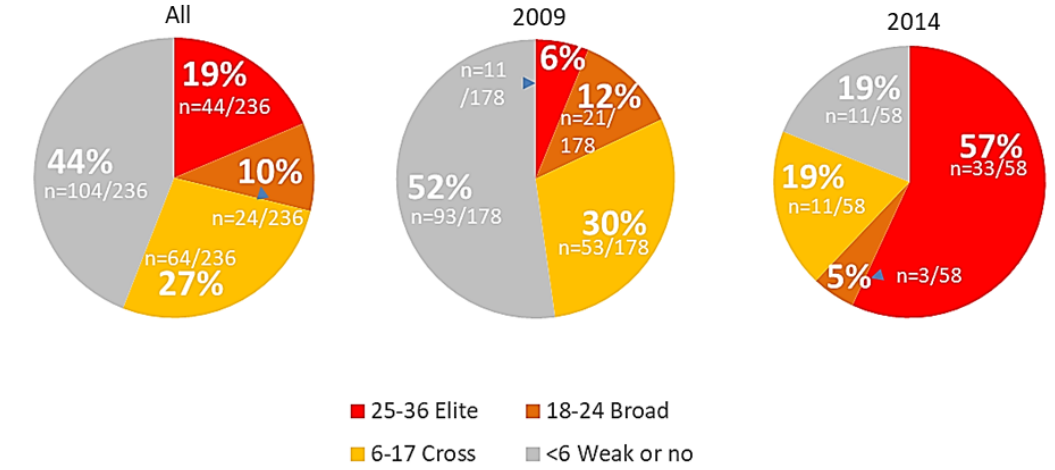

C)

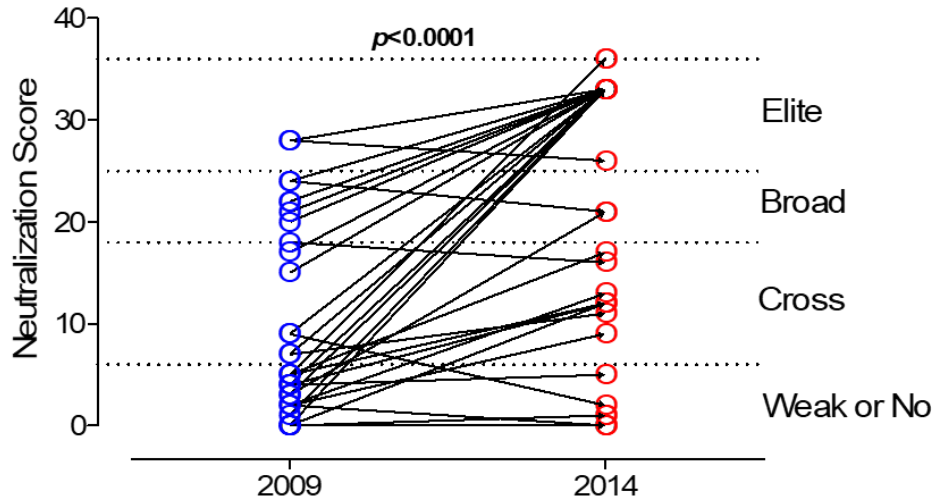

D)

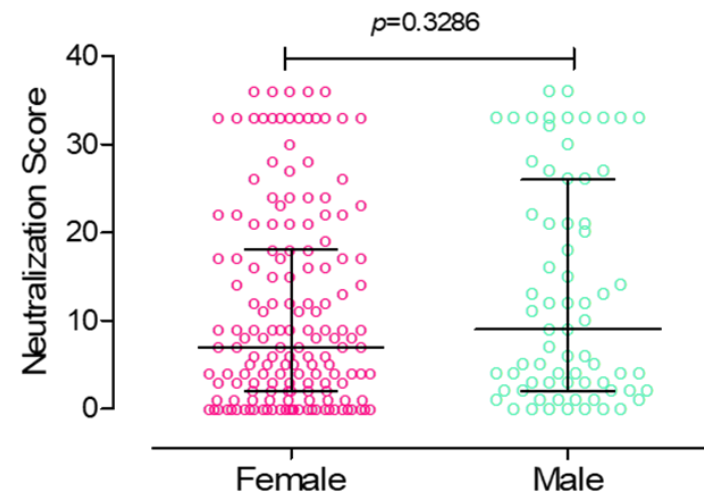

337 **Figure 2-** Neutralization score (NS) in HIV-1 infected patients from Angola as a function of year  
338 of sampling and sex. A) NS in 2009 is represented in blue and in 2014 in red; NS in all patients is  
339 in green. B) Angolan patients were categorized into 4 groups according to the NS as follows: no  
340 or weak neutralizers, <6 (grey); Cross neutralizers, 6-17 (yellow); Broad neutralizers, 18-24  
341 (orange); Elite neutralizers, 25-36 (red). C) Neutralization score in matched samples collected in  
342 2009 and 2014, showing the NS categories. D) NS in males and females. Median and interquartile  
343 range are shown. P values were obtained using the Mann Whitney U test.

344

345 The 50% neutralization titers ( $ID_{50}$ ) against the 12 Env-pseudotyped virus indicator panel were  
346 determined in a subset of plasma samples from 2009 (n=28) and 2014 (n=10) showing broad  
347 and elite neutralizing activity (**Figure 3A**). When comparing unmatched samples, neutralization  
348 titers were significantly higher in 2014 than in 2009 [median  $\log_{10} ID_{50}$  in 2009= 1.903, IQ: 1.602-  
349 2.505 (n=336 plasma-virus pairs) vs median  $\log_{10} ID_{50}$  in 2014= 2.204, IQ: 1.903- 2.806 (n= 120  
350 plasma-virus pairs),  $p=0.0013$ ] (**Figure 3A/B**).



A)

| Year        | ID  | Clade            | Number of CD4+ T cells/ $\mu$ l | HIV-1 Clade |        |        |       |      |       |      |       |       |       |       | VSV  | NS  |       |     |    |
|-------------|-----|------------------|---------------------------------|-------------|--------|--------|-------|------|-------|------|-------|-------|-------|-------|------|-----|-------|-----|----|
|             |     |                  |                                 | C           |        |        | A     | G    | AC    |      | AE    |       | B     |       |      |     | BC    |     |    |
|             |     |                  |                                 | 25710       | CE0217 | CE1176 | 398F1 | 1632 | 246F3 | CNE8 | CNE55 | TRO11 | X2278 | X2000 |      |     | CHI19 |     |    |
| 2009 (n=28) | 33  | F1               | 208                             | 160         | <40    | 40     | 80    | 40   | 40    | 80   | <40   | 40    | 320   | <40   | 40   | <40 | 21    |     |    |
|             | 43  | G                | NA                              | 80          | <40    | 80     | 80    | <40  | 80    | 160  | <40   | 40    | <40   | <40   | 40   | <40 | 18    |     |    |
|             | 53  | C                | NA                              | 640         | <40    | 1280   | 160   | 80   | 320   | <40  | 320   | <40   | <40   | 160   | 320  | <40 | 24    |     |    |
|             | 54  | F1               | 239                             | 160         | 80     | 640    | 80    | 80   | 80    | <40  | <40   | <40   | 40    | 160   | 320  | <40 | 27    |     |    |
|             | 61  | C                | 109                             | 640         | 640    | 640    | 2560  | 640  | 1280  | <40  | 1280  | 640   | 320   | 2560  | 1280 | <40 | 33    |     |    |
|             | 72  | A1               | 270                             | 160         | <40    | <40    | 2560  | <40  | 640   | <40  | <40   | 80    | <40   | 40    | <40  | <40 | 19    |     |    |
|             | 77  | C                | 86                              | 160         | 40     | 40     | 80    | 80   | 40    | 40   | <40   | 40    | 320   | 40    | 40   | <40 | 25    |     |    |
|             | 103 | C                | 181                             | 80          | 40     | 40     | 40    | <40  | 320   | 1280 | 80    | 40    | 40    | 40    | 160  | <40 | 30    |     |    |
|             | 104 | ND               | NA                              | 40          | <40    | 80     | 160   | 80   | 80    | <40  | 40    | <40   | <40   | 40    | 160  | <40 | 24    |     |    |
|             | 122 | H                | NA                              | 640         | 40     | 1280   | 40    | 40   | <40   | <40  | 80    | 80    | <40   | 160   | <40  | <40 | 21    |     |    |
|             | 125 | G                | 306                             | 640         | 40     | 640    | 40    | 80   | 80    | 640  | <40   | <40   | 80    | <40   | 160  | <40 | 17    |     |    |
|             | 131 | F1               | 272                             | 320         | 40     | 640    | <40   | 40   | 40    | 160  | <40   | <40   | 40    | 80    | 640  | <40 | 24    |     |    |
|             | 137 | C                | NA                              | 80          | 80     | 40     | 80    | 40   | 80    | 320  | 80    | 40    | 80    | <40   | 160  | <40 | 29    |     |    |
|             | 143 | C                | 359                             | 40          | 40     | 80     | 1280  | 40   | 80    | 80   | <40   | 80    | 160   | 40    | 80   | <40 | 28    |     |    |
|             | 153 | H                | 585                             | 40          | 40     | <40    | 640   | 80   | <40   | 40   | 80    | 40    | 320   | <40   | <40  | <40 | 18    |     |    |
|             | 169 | C                | 106                             | 80          | 40     | 80     | 640   | 160  | 320   | 320  | 160   | 80    | 160   | 40    | 1280 | <40 | 36    |     |    |
|             | 175 | C                | 488                             | 40          | <40    | <40    | 40    | 80   | 1280  | 640  | 320   | 80    | <40   | <40   | 640  | <40 | 22    |     |    |
|             | 178 | H                | 125                             | 40          | 40     | <40    | <40   | 40   | <40   | 320  | 160   | 160   | <40   | 80    | 160  | <40 | 25    |     |    |
|             | 183 | D                | NA                              | 80          | 80     | 40     | 640   | 40   | 1280  | 640  | 160   | <40   | 160   | <40   | 80   | <40 | 26    |     |    |
|             | 184 | H                | 58                              | 80          | 160    | 40     | <40   | 80   | 640   | 320  | 160   | 320   | 320   | 80    | 80   | <40 | 21    |     |    |
|             | 192 | H                | 248                             | 80          | <40    | 40     | 160   | 40   | <40   | 40   | <40   | <40   | 320   | 40    | <40  | <40 | 18    |     |    |
|             | 198 | C                | 737                             | 160         | 80     | 160    | 80    | 40   | 80    | 40   | <40   | 40    | 80    | 40    | 320  | <40 | 23    |     |    |
|             | 199 | G                | 402                             | 320         | 40     | 40     | 640   | <40  | <40   | 40   | 40    | 40    | 80    | 40    | 80   | <40 | 20    |     |    |
|             | 205 | C                | 85                              | 320         | 40     | <40    | 40    | 40   | 40    | 40   | <40   | <40   | 40    | 40    | 40   | <40 | 23    |     |    |
|             | 209 | ND               | ND                              | 640         | 40     | 80     | 640   | 40   | 40    | 160  | 40    | 80    | 80    | <40   | 80   | <40 | 24    |     |    |
|             | 278 | G                | 27                              | 80          | 160    | <40    | 640   | 160  | 640   | 160  | 640   | 160   | 640   | ND    | <40  | 160 | 160   | <40 | 27 |
|             | 279 | H                | NA                              | 1280        | 640    | 1280   | 640   | 40   | 1280  | 80   | 640   | ND    | 640   | 320   | 640  | <40 | 32    |     |    |
|             | 293 | G                | 234                             | 40          | <40    | <40    | 40    | 40   | <40   | <40  | 1280  | ND    | 40    | <40   | 640  | <40 | 21    |     |    |
| 2014 (n=10) | 1   | ND               | 555                             | 40          | 320    | 160    | 1280  | 40   | 40    | 40   | 80    | 40    | 40    | 40    | <40  | 36  |       |     |    |
|             | 21  | ND               | NA                              | 160         | 80     | 80     | 160   | 80   | <40   | 80   | 160   | 80    | 160   | 80    | <40  | <40 | 30    |     |    |
|             | 31  | A*               | 209 <sup>†</sup>                | 1280        | 640    | 1280   | 2560  | 1280 | 1280  | 1280 | 640   | 1280  | 2560  | 1280  | 640  | <40 | 36    |     |    |
|             | 37  | G*               | 649                             | 320         | 320    | 320    | 1280  | 40   | 40    | 40   | 640   | 40    | 40    | 40    | 40   | <40 | 36    |     |    |
|             | 42  | G*               | 183 <sup>†</sup>                | 160         | 40     | 160    | 320   | 160  | <40   | 80   | 40    | 80    | 1280  | 320   | 40   | <40 | 27    |     |    |
|             | 50  | C                | 326                             | 640         | 160    | 640    | 640   | 640  | 160   | 320  | 160   | 320   | 640   | 640   | 320  | <40 | 36    |     |    |
|             | 57  | A2*              | NA                              | 320         | 160    | 160    | 640   | 160  | 160   | 320  | 160   | 320   | 320   | 320   | 160  | <40 | 36    |     |    |
|             | 143 | C                | 359 <sup>†</sup>                | 160         | <40    | 80     | 1280  | <40  | 40    | <40  | <40   | 160   | 160   | 320   | 160  | <40 | 26    |     |    |
| 165         | ND  | 228 <sup>†</sup> | 640                             | 320         | 320    | 640    | <40   | <40  | 80    | <40  | 40    | <40   | <40   | <40   | <40  | 36  |       |     |    |
| 171         | ND  | NA               | 40                              | <40         | <40    | 40     | 40    | 320  | 160   | 320  | 640   | <40   | 320   | 640   | <40  | 21  |       |     |    |

B)

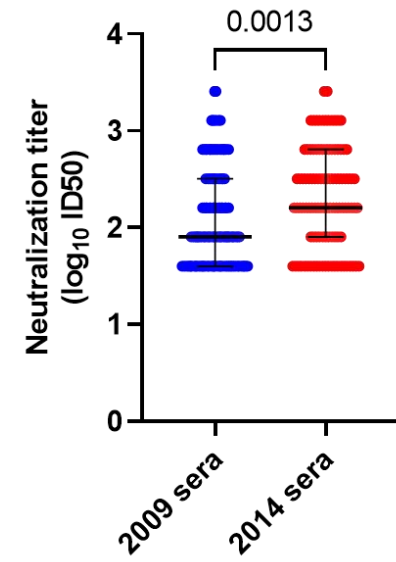

352 **Figure 3-** Antibody neutralization titers in a subset of unmatched plasma samples from elite and  
353 broad neutralizers from 2009 (n=28) and 2014 (n=10). A) Heatmap of the neutralization titers  
354 (ID50) and neutralization score against the 12 Env-pseudotyped virus indicator panel. ID50  
355 values are color-coded, with darker colors implying higher ID50 values. \*HIV subtype  
356 determined in the pol gene. † Number of CD4+ T cells determined in 2009; ND- not done due to  
357 lack of sample; NS- neutralization score; VSV-pseudotyped viruses (neutralization specificity  
358 control). B) Comparison of antibody neutralization titers in 2009 and 2014. Log<sub>10</sub> ID50 values  
359 obtained by each patient sample against the 12 Env-pseudotyped virus indicator panel are  
360 plotted. Lines indicate the median with interquartile range. P value was obtained using the Mann  
361 Whitney U test.

362 Overall, these results suggest that duration of infection is an important correlate of the potency  
363 and breadth of the neutralizing antibody response in Angolan patients infected with HIV-1.

364 To analyse the impact of HIV-1 subtype on neutralization by Angolan samples we compared the  
365 neutralization score (NS) in patients infected with subtypes C (n=27) and A1 (n=26), the two  
366 prevailing subtypes in Angola, and in patients infected with the other subtypes and recombinant  
367 forms (n=56). Only samples collected in 2009 were included in this analysis due to the limited  
368 number of samples genotyped in 2014. NS varied significantly with infecting virus subtype  
369 ( $p=0.014$ ), with subtype C leading to significantly higher NS than subtype A1 [median NS= 17.00,  
370 IQR (6.00, 25.00) vs 6.00 IQR (3.50, 15.00),  $p=0.0103$ ] or other subtypes [median NS= 17.00, IQR  
371 (6.00, 25.00) vs 8.00, IQR (1.00, 17.75),  $p=0.0087$ ] (**Figure 4A**). These results indicate that virus  
372 subtype is a major determinant of the neutralizing antibody response in our patients.

373 The indicator virus panel used in the neutralization experiments contains three subtype C strains  
374 (25710, CE1176, and CE0217) that could be more closely related to the subtype C isolates from  
375 the Angolan patients and explain the higher NS observed in patients infected with subtype C  
376 viruses. To examine this issue, we compared the susceptibility of the reference panel isolates to  
377 neutralization and found a significant variation related to virus subtype (**Figure 4B**). The easiest  
378 viruses to neutralize were isolate 25710, a subtype C from India, and 398F1, a subtype A from  
379 Tanzania. On the other hand, viruses most resistant to neutralization were 2278, a subtype B  
380 from Spain and CNE8, a CRF01\_AE from China. Interestingly, subtype C isolates CE1176 and  
381 CE0217 from Malawi were significantly more resistant to neutralization than 25710 suggesting  
382 a closer relationship of subtype C isolates from Angola to this Indian subtype C isolate and  
383 showing that subtype per se is not the main determinant of susceptibility to antibody  
384 neutralization. To investigate the impact of the evolutionary distance between the HIV-1  
385 Angolan isolates and the indicator virus panel on the neutralizing antibody responses, we aligned  
386 the C2V3C3 amino acid sequences from the Angolan isolates (year 2009) with those from the

387 indicator virus panel. As expected, subtype C viruses from the patients were more closely related  
388 with subtype C viruses of the indicator panel relative to other subtypes (**Figure S5A**). There was  
389 a significant negative correlation of amino acid distance of the indicator panel to NS (Spearman  
390  $r = -0.2319$ ,  $p = 0.019$ ) (**Figure S5B**). Hence, the closer the isolate from the indicator panel was to  
391 the patient's C2V3C3 amino acid sequence, the easier it was neutralized. On average, clade C  
392 reference strain 25710 from the indicator panel was the closest indicator virus panel member  
393 to the Angolan isolates and, not surprisingly, it was the easiest virus to neutralize. At the other  
394 end, clade B reference strain 2278 was the furthest away from the C2V3C3 Angolan sequences  
395 and was the most difficult virus to neutralize along with the CRF01\_AE virus (CNE8).  
396 Nevertheless, many patients infected with all subtypes developed potent bNAb responses  
397 despite the high genetic distance to the viruses of the indicator panel, indicating that other  
398 factors besides the relatedness with the indicator panel contribute to the potency of the  
399 neutralizing response.

400

401

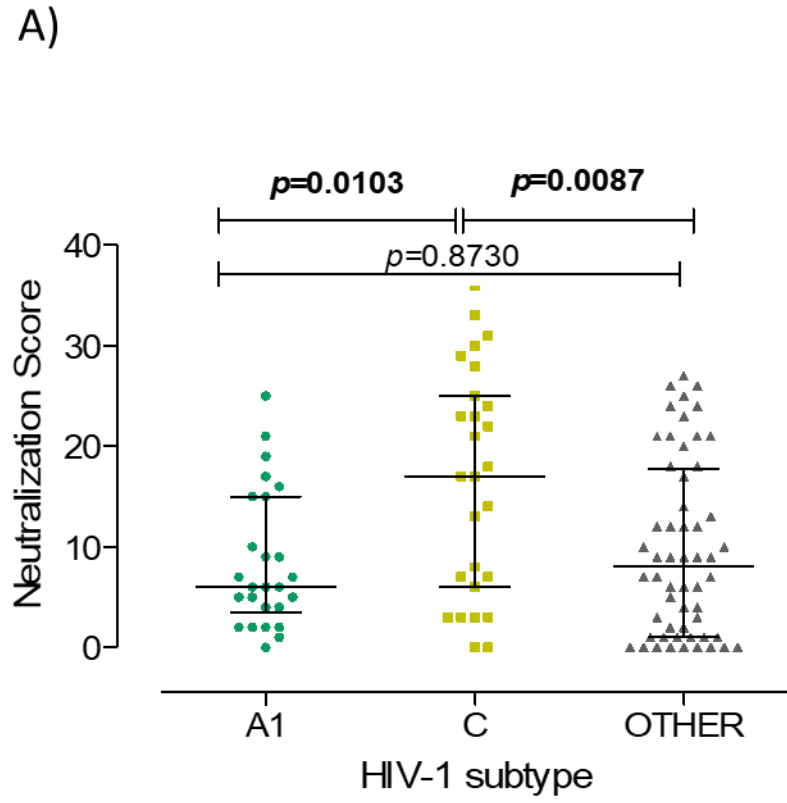

402

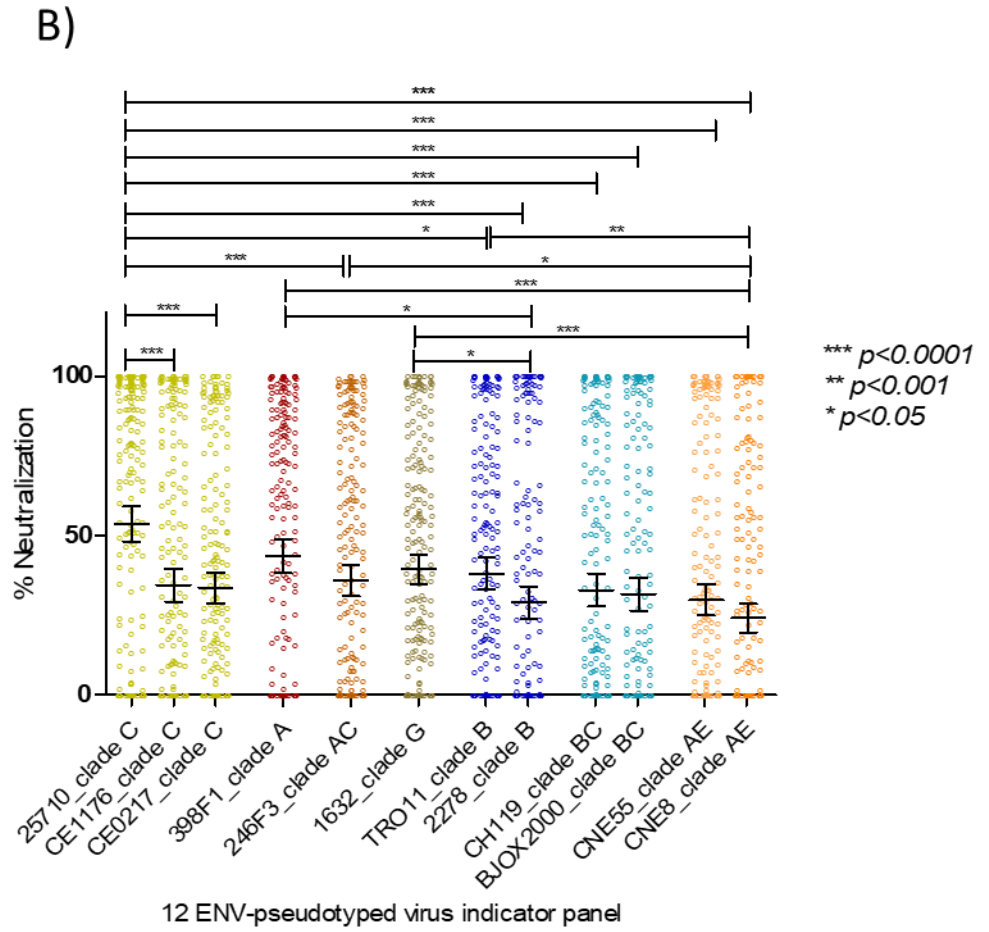

403 **Figure 4**– Impact of HIV-1 subtype on antibody neutralization. A) Neutralization score in patients  
404 infected with the two most common subtypes in Angola (year 2009), C (n=27) and A1 (n=26),  
405 and in patients infected with other subtypes and recombinant forms (n=56). The Kruskal-Wallis  
406 nonparametric test was used to analyse the difference in median NS for all subtypes ( $p=0.014$ ).  
407 Dunns multiple comparison test was used to analyse differences in NS between subtypes.  
408 Median and interquartile range are shown. B) Percent neutralization of each of the 12 Env-  
409 pseudotyped virus indicator panel by the plasma samples (at 1:40 dilution) from the Angolan  
410 patients (N=236). Mean percent neutralization and 95% confidence interval bars against a given  
411 virus from the indicator panel are shown. Statistically significant differences are represented by  
412 the P values obtained with Dunns multiple comparison test. \*\*\*  $p<0.0001$ , \*\*  $p<0.001$ , \* $p<0.05$ .

413 Drug naïve patients (year 2009) with  $\leq 200$  CD4+ T cells/ $\mu$ l at study entry had significantly higher  
414 NS values than patients with  $> 200$  CD4+ T cells/ $\mu$ l [median NS in patients  $\leq 200$  CD4+ T cell counts  
415 was 7.00 (IQR, 3.50, 21.00) vs 4.00 (1.00, 12.00) in patients with  $> 200$  CD4+ T cell counts,  $p =$   
416 0.0193] (**Figure 5A**). Moreover, NS values were inversely associated with CD4+ T cell counts  
417 (Spearman  $r = -0.3043$ ,  $p = 0.0005$ ) (**Figure 5B**) and directly associated with age (Spearman  
418  $r = 0.1644$ ,  $p = 0.0302$ ) in these patients (**Figure 5C**). These results suggest that elicitation of high  
419 levels of broadly neutralizing antibodies in these patients is directly correlated with prolonged  
420 antigenic stimulation<sup>68</sup>.

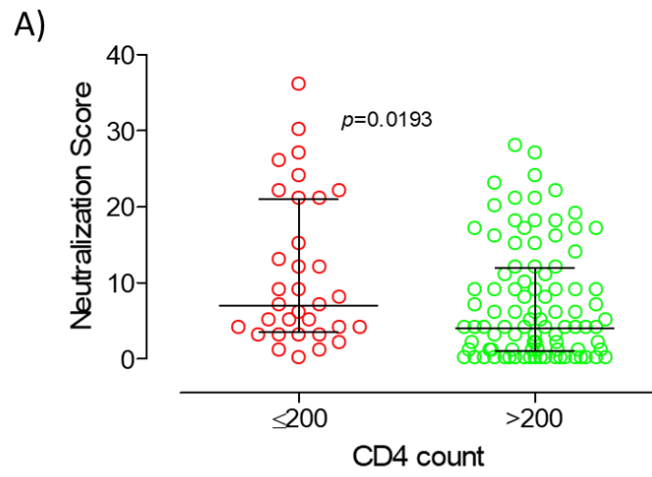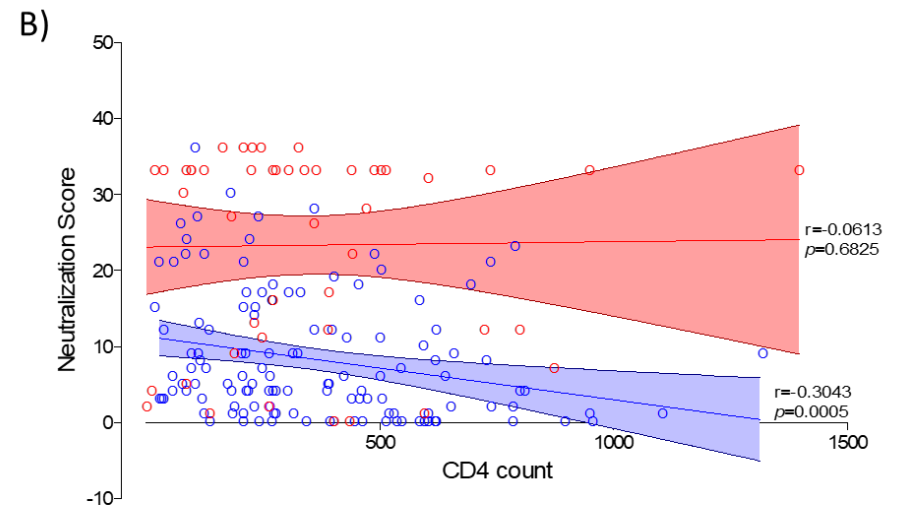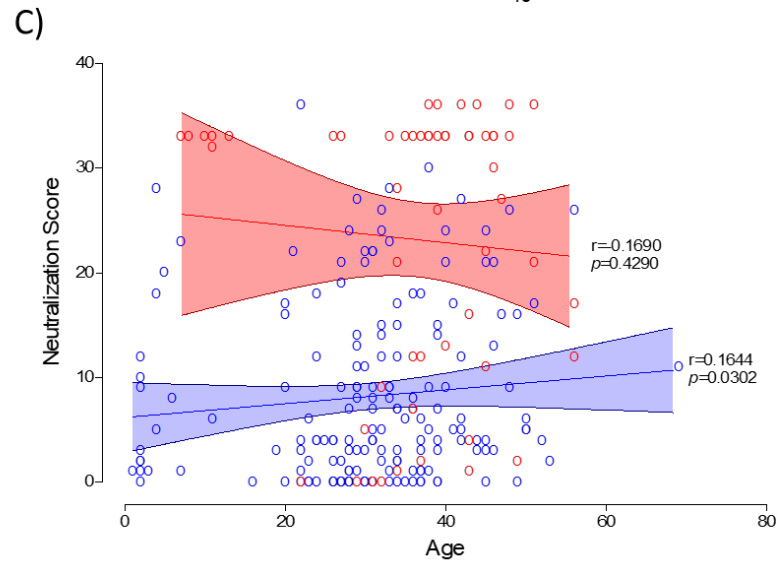



422 **Figure 5--** Correlation between neutralization score, CD4+ T cell counts and patient's age. A)  
423 Neutralization score differences between 2009 patient's with  $\leq 200$  CD4+ T cell counts at study  
424 entry and patients with  $>200$  CD4 T cell counts. Median and interquartile range are shown. P  
425 values were obtained using the Mann Whitney U test; B) Correlation of neutralization score with  
426 CD4+ T cell counts in 2009 and 2014; C) Correlation of neutralization score with patient's age in  
427 2009 and 2014. Samples collected in 2009 are shown in blue and samples collected in 2014 in  
428 red. Linear trend is shown with mean and 95% CI bands; Spearman r and P values are indicated.  
429

#### 430 **Epitope specificities of the plasma neutralizing antibodies**

431 In the same subset of 38 plasma samples (n=28 from 2009 and n=10 from 2014) from broad and  
432 elite neutralizers, the epitope specificities were mapped using a computational clustering tool  
433 based on the epitope specificities of a panel of human bNAbs<sup>64</sup>. Six (15.8%) samples did not  
434 cluster with any of the bNAbs. Thirty-two (84.2%) samples clustered with one of the bNAbs. Of  
435 these most samples (68.8%, 22/32) clustered with PGT128 and 2G12, two bNAbs that target the  
436 V3 glycan supersite with important contact residues in V3 and V4 (**Figure 6**)<sup>69,70</sup>. Five (15.6%)  
437 samples clustered with bnAb 4E10 that targets the gp41 membrane-proximal external region  
438 (MPER)<sup>71</sup>. Four (12.5%) samples clustered with VRC01 and VRC-CH31 bNAbs that target the CD4  
439 binding site. Finally, one (3.1%) sample clustered with PG16 and PG9 that target the V1V2  
440 glycans. These results indicate that the V3 glycan supersite is the dominant broadly neutralizing  
441 epitope in Angolan patients.

442

443

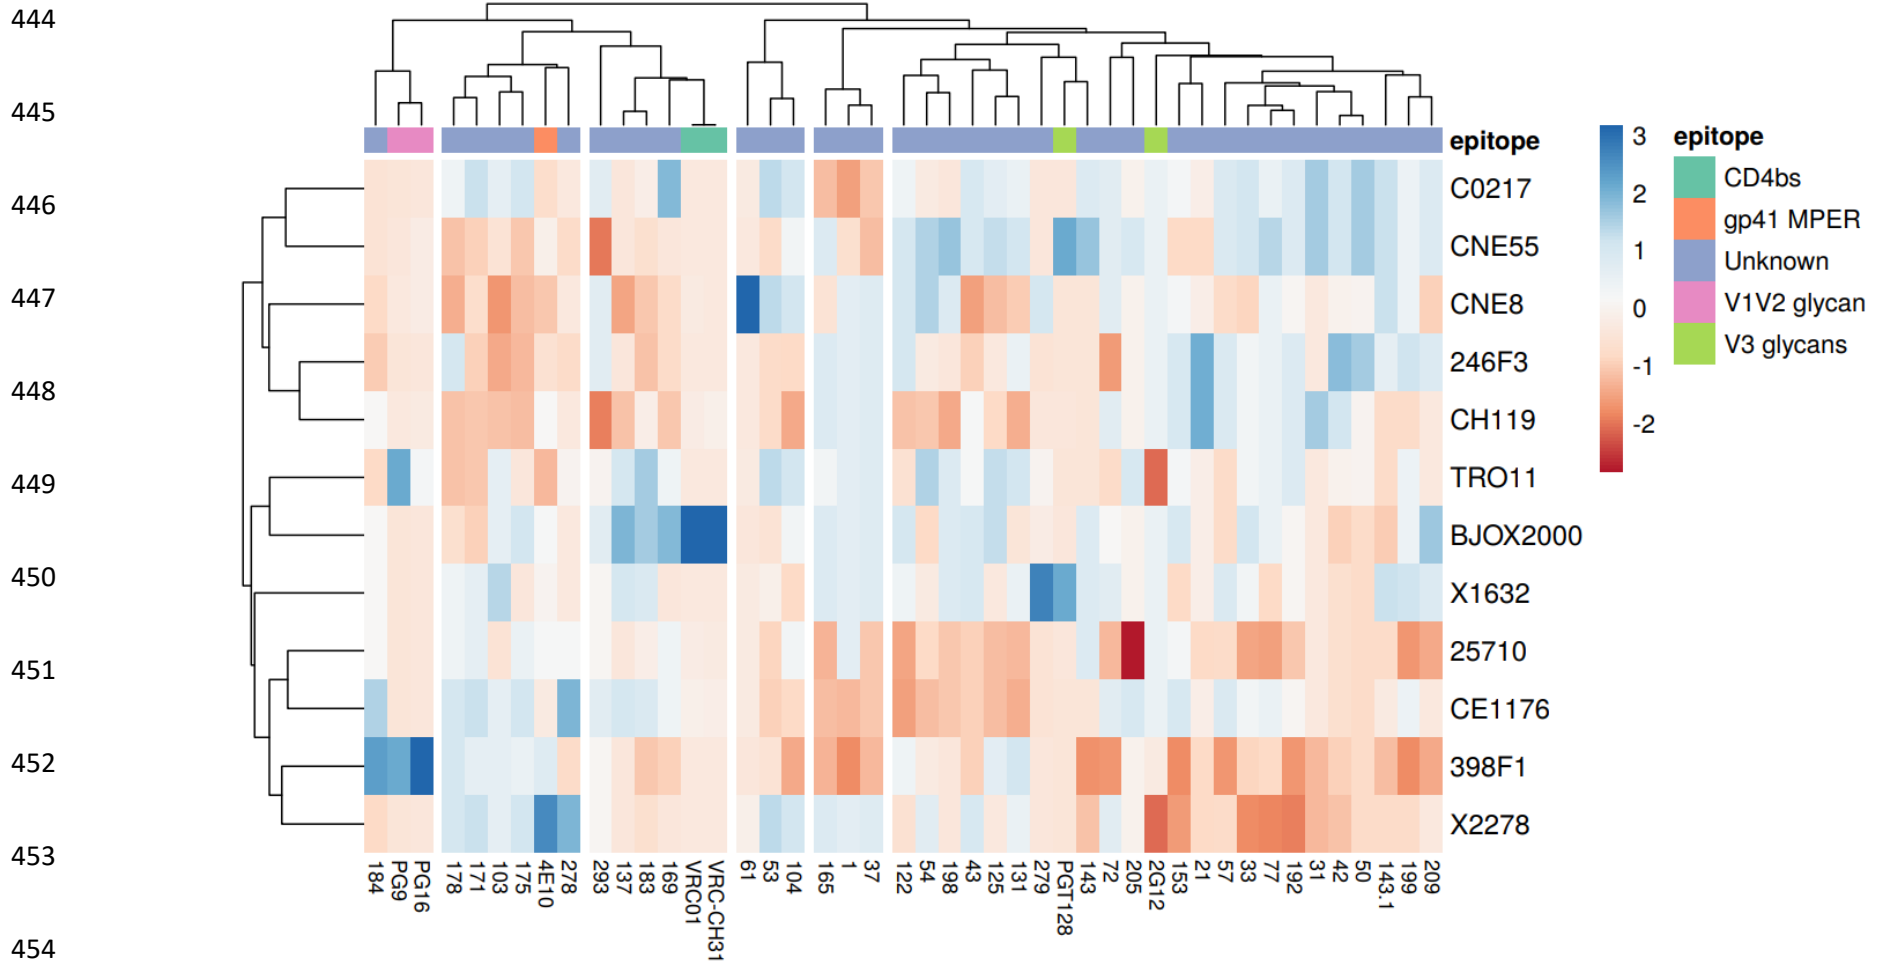

456 **Figure 6- Cluster analysis and heatmap of the predicted epitope specificity in the top**  
457 **neutralizing patients from Angola.** In the top of the columns, known bnAb epitopes are coloured  
458 according to the respective epitope specificities as shown by the legend. The identification of  
459 the plasma samples and bnAbs is shown in the bottom of the columns. Cluster analysis for both  
460 rows and columns were computed according to the Pearson correlation <sup>64</sup>. Blue colours in the  
461 heatmap represent lower neutralization activity and red colours higher neutralization activity.  
462 Each column represents the neutralization values of a given plasma sample or a bnAb of known  
463 specificities against the 12 Env-pseudotyped virus panel whose names are indicated to the left.

464

465 **Neutralization score is directly related with titer of C2V3C3-binding antibodies in all subtypes**

466 The antibody binding reactivity against a panel of recombinant polypeptides comprising the C2,  
467 V3, and C3 envelope regions of subtypes B, C, G, H, J, and CRF02\_AG was characterized in a  
468 subset of samples from 2009 (n=48) and 2014 (n=16) with known antibody neutralization profile.  
469 All but the B polypeptide were derived from Angolan isolates. All but six samples from five  
470 patients reacted with all C2V3C3 polypeptides demonstrating the high antigenicity of this  
471 envelope region (**Figure S6**). In 2009, patients had significantly higher median antibody binding  
472 titers against subtype C than against subtypes G ( $p=0.0007$ ), H ( $p=0.0282$ ), J ( $p=0.0052$ ), and  
473 CRF02\_AG ( $p=0.0149$ ). Of note, median antibody binding titers were always higher in 2014  
474 relative to 2009 regardless of the C2V3C3 polypeptide subtype but this was not significant  
475 except for CRF02\_AG.

476 The higher antibody reactivity against subtype C antigen could be related with the higher  
477 neutralizing responses observed in subtype C infected patients. We therefore investigated  
478 possible associations between neutralization score, C2V3C3 antibody binding titer and subtype.  
479 Remarkably, C2V3C3 antibody binding titer was positively associated with NS values, i.e.,  
480 patients with higher antibody binding titers to C2V3C3 polypeptides had higher neutralizing

481 antibody responses (**Figure 7**). This was significant for all subtypes of the C2V3C3 recombinant  
482 polypeptides tested confirming this epitope as an important neutralizing domain in these  
483 patients independent of subtype.

484

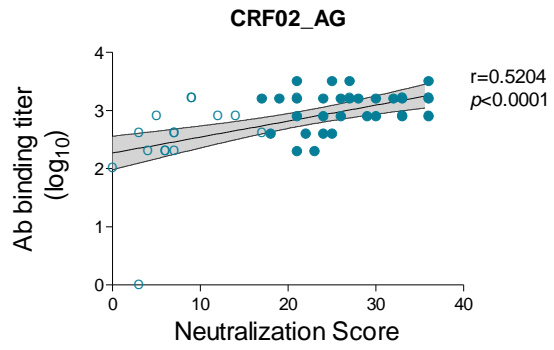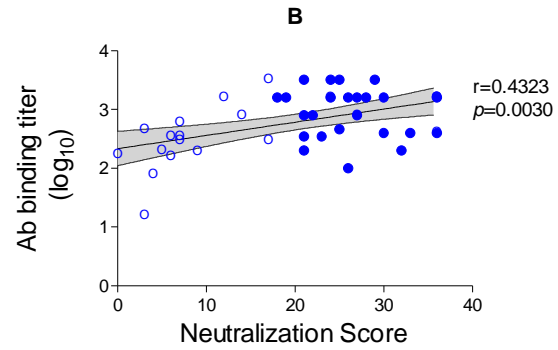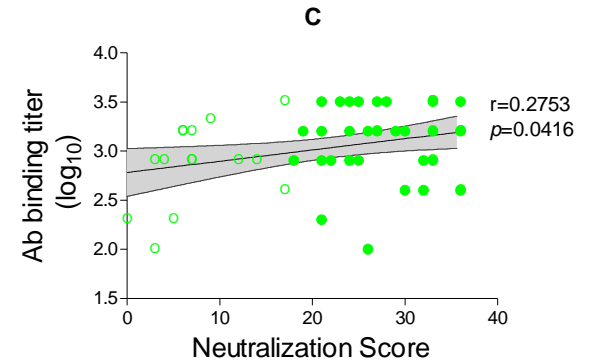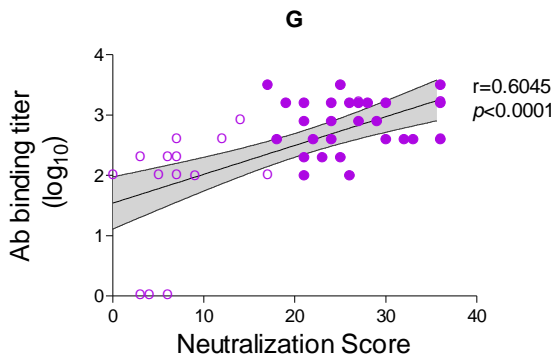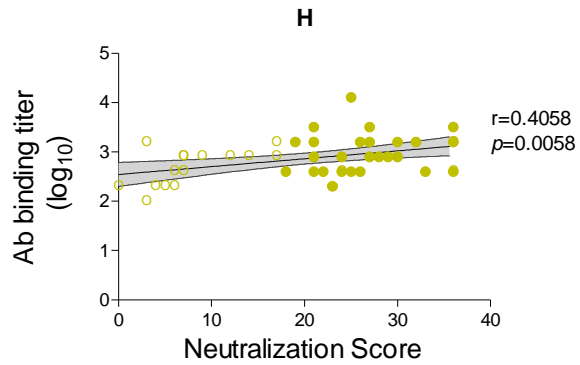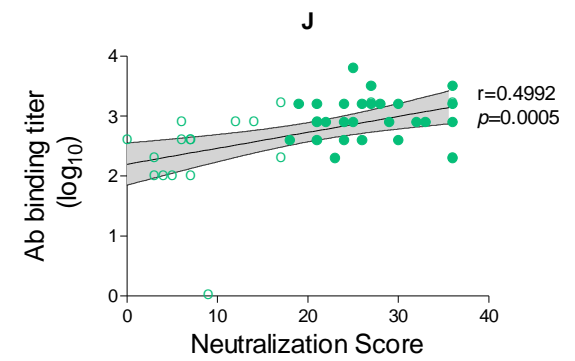

485

486

487 **Figure 7** -Association between antibody binding titer to C2V3C3 recombinant polypeptides of  
488 different subtypes and neutralization score (year 2009). Filled symbols are the antibody binding  
489 titers of the broad/elite neutralizers to a given C2V3C3 subtype. Unfilled symbols are the  
490 antibody binding titers of the no/weak and cross neutralizers to a given C2V3C3 subtype.  
491 Associations were assessed by Spearman analyses. P-values and Spearman r values are  
492 indicated. Linear trend is shown with mean and 95% CI bands.

493

#### 494 **Impact of the neutralizing antibodies in the diversity and evolution of C2V3C3**

495 Neutralizing antibodies targeting the C2, V3 and C3 envelope regions are common in HIV-1  
496 infected individuals<sup>3</sup> and escape from these antibodies leads to higher diversity in these regions  
497 as well as to higher positive selection and convergent evolution<sup>72,73,74</sup>. To investigate the impact  
498 of the neutralizing antibodies in the diversity and evolution of the envelope glycoproteins of the  
499 viruses infecting our patients, we analysed amino acid entropy and the sites under selective  
500 pressure in the C2, V3 and C3 regions in the different neutralization categories for samples  
501 collected in 2009. Considering the three regions together, mean overall entropy values were  
502 similar in all neutralization categories: weak/no neutralizers= 0.5727 [95% confidence interval  
503 (CI): 0.4753, 0.6241]; cross neutralizers= 0.5931 (0.5012, 0.6849); broad neutralizers= 0.5381  
504 (0.4472, 0.6291); and elite neutralizers= 0.4106 (0.3313, 0.4899). Regardless of neutralization  
505 category, the region with higher mean entropy was C3 [0.8528 (0.7556, 0.9500)] followed by V3  
506 [0.4659 (0.3903, 0.5414)] and C2 [0.3635 (0.3092, 0.4178)] ( $p<0.0001$ ). We then plotted  
507 Shannon's entropy differences in C2V3C3 between no/weak neutralizers and cross, broad and  
508 elite neutralizers. This analysis revealed that viruses from elite neutralizers were far less variable  
509 than viruses from weak/no neutralizers as seen by the number of amino acids with positive  
510 entropy differences relative to amino acids with negative entropy differences (37 vs 16 sites,  
511  $p=0.0023$ ) (**Figure 8**). On the other hand, viruses from broad and cross neutralizers did not vary

512 significantly from viruses from no/weak neutralizers. Relative to no/weak neutralizers, the most  
513 variable amino acid residues in the broad and elite neutralizers were found in V3 and/or C3  
514 (broad neutralizers: 1 site in C2 vs 7 sites in C3,  $p < 0.0001$ ; elite neutralizers: 3 sites in C2 vs 13  
515 sites in V3C3,  $p < 0.0001$ ), two regions that contain broadly neutralizing epitopes (**Figure 8**).

A)

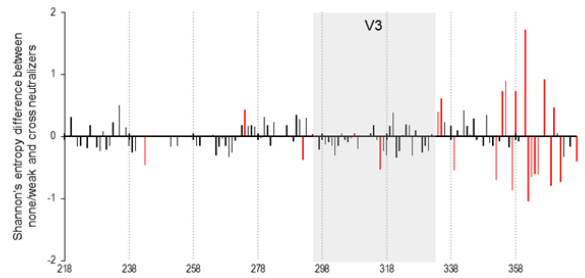

B)

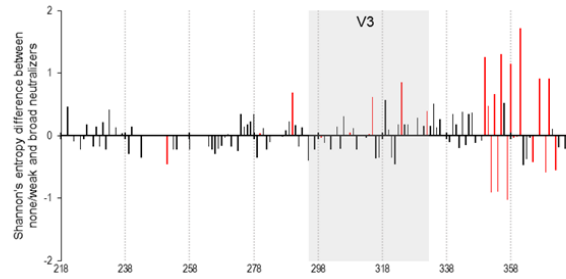

C)

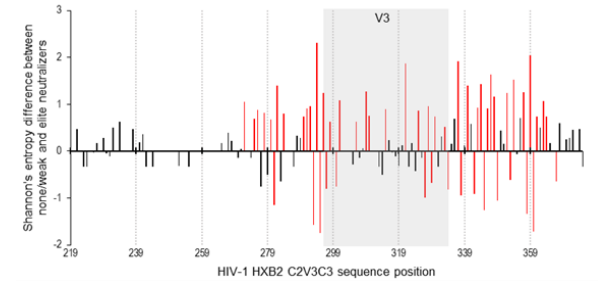

516

517

518 **Figure 8** – Amino acid entropy difference in the C2V3C3 region between neutralization categories. A) Shannon's entropy difference between No/Weak and  
519 Cross neutralizers. B) Shannon's entropy difference between No/Weak and Broad neutralizers. C) Shannon's entropy difference between No/Weak and Elite  
520 neutralizers. Sites with significant entropy difference ( $p \leq 0.05$ ) are shown in red. Gray boxes delimitate the V3 region. Numbers in the x axes indicate the  
521 amino acid position in HIV-1 HXB2.



522 Diversifying selection in C2V3C3 varied according to the different neutralization categories  
523 ( $p < 0.001$ ) (**Table S3**). Considering only sites that were selected by at least two methods, weak/no  
524 neutralizers had a total of 9 positively selected sites, cross neutralizers 6, broad neutralizers 3  
525 and elite neutralizers 1. Regardless of neutralization category most sites under selective  
526 pressure were present in the C3 region.

527 The mean number of N-glycosylation sites in C2V3C3 was similar in all neutralization categories  
528 [Non-neutralizers: 9.2 (range: 8-12); cross-neutralizers: 9.2 (range: 7-11), broad-neutralizers: 9.4  
529 (range: 7-11); elite-neutralizers: 9.8 (range: 8-11)] (**Table S4**). C3 had more potential N-  
530 glycosylation sites than C2 or V3 but sites in V3 and C2 were more conserved. For example, sites  
531 241, 262, 276 and 289 in C3 were present in  $\geq 70\%$  of strains and site 301 in the V3 crown was  
532 present in all but two strains (97%). In C3, site 332, which together with site 301 in V3 and other  
533 elements in V1, V3 and V4 is part of the V3-glycan supersite<sup>75,76</sup>, was highly conserved (70%) in  
534 all neutralization categories.

535

## 536 **Discussion**

537 HIV-1 was introduced in Angola from Kinshasa, the capital city of the Democratic Republic of  
538 Congo (DRC), likely in 1910-1940 making the Angolan epidemic the second oldest in the world  
539<sup>48</sup>. Like in the DRC, the Angolan epidemic has been driven by all subtypes but B, untypable and  
540 highly divergent strains, and multiple CRFs and URFs<sup>44, 45, 46, 47</sup>. In this study we confirmed the  
541 extremely high diversity and evolving complexity of HIV-1 strains present in Angola. Subtypes A  
542 and C dominated over other subtypes but all other Env subtypes were present along with  
543 untypable basal strains and recombinant strains that prevailed over pure subtypes. The  
544 remarkable diversity and evolution of HIV-1 in Angola is driven by the increasing number of new  
545 infections<sup>77</sup>, the limited access to antiretroviral therapy, and high levels of drug resistance<sup>46, 78</sup>.

546 The high diversity and rapid evolution of HIV-1 in this country can pose a serious challenge to  
547 vaccination and other preventive efforts.

548 At the individual level, the long-term B cell stimulation by this highly diversified ensemble of  
549 viruses may have promoted the development of exceptional neutralization breadth<sup>2, 3, 75, 79, 80, 81,</sup>  
550<sup>82, 83</sup>. We found that the majority (56%) of the patients in our cohort developed cross, broad, or  
551 elite neutralizing responses. These results far exceed those from previous cohort studies in sub-  
552 Saharan Africa<sup>3, 63, 79, 84, 85</sup>. For example, Beirnaert *et al.* found 10.6% broad neutralizers in  
553 Cameroon<sup>85</sup> and Landais *et al.* found about 15% broad neutralizers in a cohort of HIV-1 infected  
554 patients from Eastern and South Africa<sup>3</sup>. When compared to cohort studies from other  
555 geographies where subtype B dominates, the frequency of patients with bNAbs responses  
556 reported in our study was also much higher<sup>2, 5, 86</sup>. For example, Rusert *et al.*<sup>2</sup> in Switzerland found  
557 that most patients (79.1%) showed weak or no neutralization breadth, which compares to 44%  
558 in our cohort, and that only 1.3% were elite neutralizers which compares to 19% in our cohort.  
559 This divergence may be related with many factors besides the diversity of infecting viruses, such  
560 as the HLA genotype and ethnicity of the patients, viral load, CD4+ T cell counts, and duration of  
561 infection<sup>2, 3, 79, 80, 87</sup>.

562 In agreement with other studies, neutralization score was inversely correlated with CD4+ T cell  
563 counts in 2009 when the patients were naïve to ART and had high viral load<sup>2, 3, 75, 80</sup>. This is  
564 generally associated with high envelope stimulation of B cells and inevitably leads to B-cell  
565 exhaustion in chronic viraemic HIV-1 infection<sup>88</sup>. Remarkably, however, the frequency of elite  
566 neutralizers and the mean neutralization score in matched and unmatched patients increased  
567 significantly in 2014, when patients were already undergoing ART, relative to 2009. The boost in  
568 the quality of the neutralizing response in these patients suggest good restoration of the B cell  
569 compartment with ART which is uncommon in chronic HIV-1 infection<sup>88, 89, 90</sup>. Moreover, the  
570 moderate level of plasma viremia (median 11,660 HIV-1 RNA copies /ml, IQR, 380-30,060) found

571 in these patients may have provided the low-level antigenic stimulation needed for the full  
572 maturation of memory B cells and bNAb production<sup>31, 88, 91</sup>. This has precedent in HIV-2 infection  
573 where most patients are infected for long periods and produce potent and broadly neutralizing  
574 responses in a setting of low plasma viremia<sup>36, 92, 93</sup>. In this model, B cell exposure to low-level  
575 envelope antigens, likely in lymphoid tissues, during prolonged infection periods leads to the  
576 generation of highly specific envelope C2V3C3- specific antibodies as well as broad and potent  
577 neutralizing antibodies<sup>94</sup>.

578 Viral type and subtype as well as the nature of the epitope target on the viral envelope impact  
579 the antibody maturation process as seen by the frequency of elicitation<sup>61, 93</sup> and epitope  
580 specificity of bnAbs<sup>2, 50, 76</sup>. Differences in envelope structure and epitope exposure, length of  
581 variable loops, type of V3 motifs, N-glycosylation patterns, and conservation of key sites have  
582 helped to explain why certain HIV-1 subtypes like subtype C are better at promoting the  
583 elicitation of neutralizing antibodies<sup>2, 3, 50, 61, 76, 84, 95</sup>. In line with these studies, we found that  
584 infection with subtype C viruses was associated with enhanced neutralization breadth and  
585 potency. In general, subtype C infected individuals have shown a bias to V2-glycan directed  
586 antibody responses, and subtype C envelope from transmitted viruses have been less prone to  
587 neutralization by V3-directed antibodies due to the absence of the N332- glycan in the C3 region  
588<sup>2, 3, 76, 84, 96, 97, 98</sup>. This was not the case in our study as most top neutralizers had V3-directed  
589 antibodies that were able to neutralize the subtype C isolates from the virus panel, and the N301  
590 and N332 glycans defining the V3-glycan supersite were highly conserved in the patient's  
591 isolates. Supporting the major role of the V3 and C3 envelope regions in the development of  
592 bNAbs in our cohort, we found a strong direct correlation between the titer of antibodies  
593 binding to C2V3C3 envelope polypeptides from all subtypes and neutralization score.  
594 Nonetheless, antibodies specific for the V2 apex, the CD4 binding site, the gp41 MPER and/or  
595 unknown epitopes were also found in some patients revealing the complexity of the neutralizing  
596 antibody responses in these patients.

597 We also looked at the variability of patient's sequences in the envelope C2V3C3 region to assess  
598 the impact of escape from neutralizing antibodies on viral evolution and diversity. V3 and C3  
599 were the most variable regions which is consistent with the dominant role of neutralizing  
600 antibodies targeting these regions in these patients <sup>3</sup>. V3 bNAb recognition sites and sites  
601 associated with resistance to neutralization such as N295 <sup>3, 75, 80</sup> were under positive selection in  
602 broad and elite neutralizers. However, elite neutralizers exhibited far less variability and lower  
603 number of sites under selective pressure in V3 and C3 relative to weak or low neutralizers. The  
604 convergence of the viral swarm to a few resistant strains provides convincing evidence for the  
605 crucial role of V3- and C3-directed bNAbs in controlling HIV-1 replication and diversification in  
606 these patients <sup>35, 61, 84, 99</sup>.

607 In conclusion, an exceptionally high number of Angolan patients infected with HIV-1 elicits broad  
608 and elite neutralizing antibodies mostly targeting the V3-glycan supersite. This is associated with  
609 long-term and low-level V3- and C3- antigenic stimulation by the highly diverse isolates  
610 circulating in this country especially subtype C. These results have direct implications for the  
611 design of a new generation of HIV-1 vaccines.

612

### 613 **Acknowledgments**

614 We greatly acknowledge the contribution and efforts of the staff and patients from the Hospital  
615 da Divina Providência in Luanda for this study. TZM-bl cells were obtained through the NIH AIDS  
616 Reagent Program, Division of AIDS, NIAID, NIH. This work was supported by Fundação para a  
617 Ciência e a Tecnologia (FCT), Portugal, under project grants UIDB/04138/2020 and  
618 UIDP/04138/2020. This study was in part supported by the NIH/NIAID under grant R01AI087520.  
619 Francisco Martin was supported by FCT under PhD grant number SFRH/BD/87488/2012. CP is  
620 funded by FCT under a contract-program as defined by DL No. 57/2016 and Law No. 57/2017.

621

622 **Authors' contributions**

623 Francisco Martin<sup>1</sup>, José Maria Marcelino<sup>1,2</sup>, Claudia Palladino<sup>1</sup>, Inês Bárto<sup>1</sup>, Susana Tracana<sup>1</sup>,  
624 Inês Moranguinho<sup>1</sup>, Paloma Gonçalves<sup>1</sup>, Rita Mateus<sup>1</sup>, Rita Calado<sup>1</sup>, Pedro Borrego<sup>1</sup>, Thomas  
625 Leitner<sup>3</sup>, Sofia Clemente<sup>4</sup>, Nuno Taveira<sup>1,2#</sup>

626

627 NT and SC: conceived and designed the study. SC: provided the patients' data and specimens.  
628 FM, JMM, IB, ST, IM, PG, RM, RC, PB, and TL: performed the experiments. FM, JMM, CP, TL and  
629 NT: analyzed the data. FM, TL, and NT performed the statistical analysis. FM, TL and NT drafted  
630 the manuscript and discussed the final version. All authors read and approved the final  
631 manuscript.

632

633 **References**

- 634 1. Horwitz JA, *et al.* Non-neutralizing Antibodies Alter the Course of HIV-1 Infection In Vivo.  
635 *Cell* **170**, 637-648 e610 (2017).  
636  
637 2. Rusert P, *et al.* Determinants of HIV-1 broadly neutralizing antibody induction. *Nat Med*  
638 **22**, 1260-1267 (2016).  
639  
640 3. Landais E, *et al.* Broadly Neutralizing Antibody Responses in a Large Longitudinal Sub-  
641 Saharan HIV Primary Infection Cohort. *PLoS Pathog* **12**, e1005369 (2016).  
642  
643 4. Hu X, *et al.* Profiling the neutralizing antibody response in chronically HIV-1 CRF07\_BC-  
644 infected intravenous drug users naive to antiretroviral therapy. *Sci Rep* **7**, 46308 (2017).  
645  
646 5. Hraber P, *et al.* Impact of clade, geography, and age of the epidemic on HIV-1  
647 neutralization by antibodies. *J Virol* **88**, 12623-12643 (2014).  
648  
649 6. Tomaras GD, *et al.* Polyclonal B cell responses to conserved neutralization epitopes in a  
650 subset of HIV-1-infected individuals. *J Virol* **85**, 11502-11519 (2011).  
651  
652 7. Simek MD, *et al.* Human immunodeficiency virus type 1 elite neutralizers: individuals  
653 with broad and potent neutralizing activity identified by using a high-throughput

- 654 neutralization assay together with an analytical selection algorithm. *J Virol* **83**, 7337-  
655 7348 (2009).
- 656
- 657 8. Stephenson KE, Wagh K, Korber B, Barouch DH. Vaccines and Broadly Neutralizing  
658 Antibodies for HIV-1 Prevention. *Annu Rev Immunol* **38**, 673-703 (2020).
- 659
- 660 9. Walker LM, *et al.* Broad and potent neutralizing antibodies from an African donor reveal  
661 a new HIV-1 vaccine target. *Science* **326**, 285-289 (2009).
- 662
- 663 10. Caskey M, *et al.* Viraemia suppressed in HIV-1-infected humans by broadly neutralizing  
664 antibody 3BNC117. *Nature* **522**, 487-491 (2015).
- 665
- 666 11. Caskey M, *et al.* Corrigendum: Viraemia suppressed in HIV-1-infected humans by  
667 broadly neutralizing antibody 3BNC117. *Nature*, (2016).
- 668
- 669 12. Caskey M, *et al.* Antibody 10-1074 suppresses viremia in HIV-1-infected individuals. *Nat*  
670 *Med* **23**, 185-191 (2017).
- 671
- 672 13. Schoofs T, *et al.* HIV-1 therapy with monoclonal antibody 3BNC117 elicits host immune  
673 responses against HIV-1. *Science* **352**, 997-1001 (2016).
- 674
- 675 14. Scheid JF, *et al.* HIV-1 antibody 3BNC117 suppresses viral rebound in humans during  
676 treatment interruption. *Nature* **535**, 556-560 (2016).
- 677
- 678 15. Nishimura Y, Martin MA. Of Mice, Macaques, and Men: Broadly Neutralizing Antibody  
679 Immunotherapy for HIV-1. *Cell Host Microbe* **22**, 207-216 (2017).
- 680
- 681 16. Corey L, *et al.* Two Randomized Trials of Neutralizing Antibodies to Prevent HIV-1  
682 Acquisition. *N Engl J Med* **384**, 1003-1014 (2021).
- 683
- 684 17. Spencer DA, Shapiro MB, Haigwood NL, Hessel AJ. Advancing HIV Broadly Neutralizing  
685 Antibodies: From Discovery to the Clinic. *Front Public Health* **9**, 690017 (2021).
- 686
- 687 18. Burton DR, Mascola JR. Antibody responses to envelope glycoproteins in HIV-1 infection.  
688 *Nat Immunol* **16**, 571-576 (2015).
- 689
- 690 19. Gray GE, *et al.* Vaccine Efficacy of ALVAC-HIV and Bivalent Subtype C gp120-MF59 in  
691 Adults. *N Engl J Med* **384**, 1089-1100 (2021).
- 692
- 693 20. Sanders RW, *et al.* A next-generation cleaved, soluble HIV-1 Env trimer, BG505  
694 SOSIP.664 gp140, expresses multiple epitopes for broadly neutralizing but not non-  
695 neutralizing antibodies. *PLoS Pathog* **9**, e1003618 (2013).
- 696

- 697 21. Julien JP, *et al.* Design and structure of two HIV-1 clade C SOSIP.664 trimers that increase  
698 the arsenal of native-like Env immunogens. *Proc Natl Acad Sci U S A* **112**, 11947-11952  
699 (2015).
- 700
- 701 22. Sanders RW, *et al.* HIV-1 VACCINES. HIV-1 neutralizing antibodies induced by native-like  
702 envelope trimers. *Science* **349**, aac4223 (2015).
- 703
- 704 23. Pugach P, *et al.* A native-like SOSIP.664 trimer based on an HIV-1 subtype B env gene. *J*  
705 *Viro* **89**, 3380-3395 (2015).
- 706
- 707 24. Zhang P, *et al.* A multiclade env-gag VLP mRNA vaccine elicits tier-2 HIV-1-neutralizing  
708 antibodies and reduces the risk of heterologous SHIV infection in macaques. *Nat Med*  
709 **27**, 2234-2245 (2021).
- 710
- 711 25. Julg B, Barouch DH. Neutralizing antibodies for HIV-1 prevention. *Curr Opin HIV AIDS* **14**,  
712 318-324 (2019).
- 713
- 714 26. Cohen YZ, Caskey M. Broadly neutralizing antibodies for treatment and prevention of  
715 HIV-1 infection. *Curr Opin HIV AIDS* **13**, 366-373 (2018).
- 716
- 717 27. McGuire AT, Glenn JA, Lippy A, Stamatatos L. Diverse recombinant HIV-1 Envs fail to  
718 activate B cells expressing the germline B cell receptors of the broadly neutralizing anti-  
719 HIV-1 antibodies PG9 and 447-52D. *J Virol* **88**, 2645-2657 (2014).
- 720
- 721 28. McGuire AT, *et al.* Specifically modified Env immunogens activate B-cell precursors of  
722 broadly neutralizing HIV-1 antibodies in transgenic mice. *Nat Commun* **7**, 10618 (2016).
- 723
- 724 29. Hu Y, *et al.* Virus Evolution and Neutralization Sensitivity in an HIV-1 Subtype B' Infected  
725 Plasma Donor with Broadly Neutralizing Activity. *Vaccines (Basel)* **9**, (2021).
- 726
- 727 30. Kwong PD, Mascola JR. HIV-1 Vaccines Based on Antibody Identification, B Cell  
728 Ontogeny, and Epitope Structure. *Immunity* **48**, 855-871 (2018).
- 729
- 730 31. Cizmeci D, *et al.* Distinct clonal evolution of B-cells in HIV controllers with neutralizing  
731 antibody breadth. *Elife* **10**, (2021).
- 732
- 733 32. Bonsignori M, *et al.* Staged induction of HIV-1 glycan-dependent broadly neutralizing  
734 antibodies. *Sci Transl Med* **9**, (2017).
- 735
- 736 33. Simonich CA, *et al.* HIV-1 Neutralizing Antibodies with Limited Hypermutation from an  
737 Infant. *Cell* **166**, 77-87 (2016).
- 738

- 739 34. Anthony C, *et al.* Cooperation between Strain-Specific and Broadly Neutralizing  
740 Responses Limited Viral Escape and Prolonged the Exposure of the Broadly Neutralizing  
741 Epitope. *J Virol* **91**, (2017).
- 742
- 743 35. Martinez DR, *et al.* Maternal Binding and Neutralizing IgG Responses Targeting the C-  
744 Terminal Region of the V3 Loop Are Predictive of Reduced Peripartum HIV-1  
745 Transmission Risk. *J Virol* **91**, (2017).
- 746
- 747 36. Marcelino JM, *et al.* Resistance to antibody neutralization in HIV-2 infection occurs in  
748 late stage disease and is associated with X4 tropism. *AIDS* **26**, 2275-2284 (2012).
- 749
- 750 37. Rocha C, *et al.* Evolution of the human immunodeficiency virus type 2 envelope in the  
751 first years of infection is associated with the dynamics of the neutralizing antibody  
752 response. *Retrovirology* **10**, 110 (2013).
- 753
- 754 38. Serra PA, Taveira N, Guedes RC. Computational Modulation of the V3 Region of  
755 Glycoprotein gp125 of HIV-2. *Int J Mol Sci* **22**, (2021).
- 756
- 757 39. Gray ES, *et al.* Antibody specificities associated with neutralization breadth in plasma  
758 from human immunodeficiency virus type 1 subtype C-infected blood donors. *J Virol* **83**,  
759 8925-8937 (2009).
- 760
- 761 40. Kostrikis LG, Cao Y, Ngai H, Moore JP, Ho DD. Quantitative analysis of serum  
762 neutralization of human immunodeficiency virus type 1 from subtypes A, B, C, D, E, F,  
763 and I: lack of direct correlation between neutralization serotypes and genetic subtypes  
764 and evidence for prevalent serum-dependent infectivity enhancement. *J Virol* **70**, 445-  
765 458 (1996).
- 766
- 767 41. Moore JP, Cao Y, Leu J, Qin L, Korber B, Ho DD. Inter- and intraclade neutralization of  
768 human immunodeficiency virus type 1: genetic clades do not correspond to  
769 neutralization serotypes but partially correspond to gp120 antigenic serotypes. *J Virol*  
770 **70**, 427-444 (1996).
- 771
- 772 42. deCamp A, *et al.* Global panel of HIV-1 Env reference strains for standardized  
773 assessments of vaccine-elicited neutralizing antibodies. *J Virol* **88**, 2489-2507 (2014).
- 774
- 775 43. Marcelino R, *et al.* Antibody response against selected epitopes in the HIV-1 envelope  
776 gp41 ectodomain contributes to reduce viral burden in HIV-1 infected patients. *Sci Rep*  
777 **11**, 8993 (2021).
- 778
- 779 44. Bartolo I, Calado R, Borrego P, Leitner T, Taveira N. Rare HIV-1 subtype J genomes and a  
780 new H/U/CRF02\_AG recombinant genome suggests an ancient origin of HIV-1 in Angola.  
781 *AIDS Res Hum Retroviruses*, (2016).
- 782



- 783 45. Abecasis A, *et al.* HIV-1 genetic variants circulation in the North of Angola. *Infect Genet*  
784 *Evol* **5**, 231-237 (2005).
- 785  
786 46. Bartolo I, *et al.* HIV-1 diversity, transmission dynamics and primary drug resistance in  
787 Angola. *PLoS One* **9**, e113626 (2014).
- 788  
789 47. Bartolo I, *et al.* Highly divergent subtypes and new recombinant forms prevail in the  
790 HIV/AIDS epidemic in Angola: new insights into the origins of the AIDS pandemic. *Infect*  
791 *Genet Evol* **9**, 672-682 (2009).
- 792  
793 48. Pineda-Pena AC, *et al.* On the contribution of Angola to the initial spread of HIV-1. *Infect*  
794 *Genet Evol* **46**, 219-222 (2016).
- 795  
796 49. Faria NR, *et al.* HIV epidemiology. The early spread and epidemic ignition of HIV-1 in  
797 human populations. *Science* **346**, 56-61 (2014).
- 798  
799 50. Stefic K, Bouvin-Pley M, Braibant M, Barin F. Impact of HIV-1 Diversity on Its Sensitivity  
800 to Neutralization. *Vaccines (Basel)* **7**, (2019).
- 801  
802 51. Platt EJ, Wehrly K, Kuhmann SE, Chesebro B, Kabat D. Effects of CCR5 and CD4 cell  
803 surface concentrations on infections by macrophagetropic isolates of human  
804 immunodeficiency virus type 1. *J Virol* **72**, 2855-2864 (1998).
- 805  
806 52. Bartolo I, *et al.* HIV-1 genetic diversity and transmitted drug resistance in health care  
807 settings in Maputo, Mozambique. *J Acquir Immune Defic Syndr* **51**, 323-331 (2009).
- 808  
809 53. Tamura K, Stecher G, Peterson D, Filipiński A, Kumar S. MEGA6: Molecular Evolutionary  
810 Genetics Analysis version 6.0. *Mol Biol Evol* **30**, 2725-2729 (2013).
- 811  
812 54. Posada D, Crandall KA. MODELTEST: testing the model of DNA substitution.  
813 *Bioinformatics* **14**, 817-818 (1998).
- 814  
815 55. Guindon S, Dufayard JF, Lefort V, Anisimova M, Hordijk W, Gascuel O. New algorithms  
816 and methods to estimate maximum-likelihood phylogenies: assessing the performance  
817 of PhyML 3.0. *Syst Biol* **59**, 307-321 (2010).
- 818  
819 56. Lengauer T, Sander O, Sierra S, Thielen A, Kaiser R. Bioinformatics prediction of HIV  
820 coreceptor usage. *Nat Biotechnol* **25**, 1407-1410 (2007).
- 821  
822 57. Vandekerckhove LP, *et al.* European guidelines on the clinical management of HIV-1  
823 tropism testing. *Lancet Infect Dis* **11**, 394-407 (2011).
- 824

- 825 58. Weaver S, Shank SD, Spielman SJ, Li M, Muse SV, Kosakovsky Pond SL. Datamonkey 2.0:  
826 A Modern Web Application for Characterizing Selective and Other Evolutionary  
827 Processes. *Mol Biol Evol* **35**, 773-777 (2018).
- 828  
829 59. Kosakovsky Pond SL, Frost SD. Not so different after all: a comparison of methods for  
830 detecting amino acid sites under selection. *Mol Biol Evol* **22**, 1208-1222 (2005).
- 831  
832 60. Zhang M, *et al.* Tracking global patterns of N-linked glycosylation site variation in highly  
833 variable viral glycoproteins: HIV, SIV, and HCV envelopes and influenza hemagglutinin.  
834 *Glycobiology* **14**, 1229-1246 (2004).
- 835  
836 61. Calado R, *et al.* A Prime-Boost Immunization Strategy with Vaccinia Virus Expressing  
837 Novel gp120 Envelope Glycoprotein from a CRF02\_AG Isolate Elicits Cross-Clade Tier 2  
838 HIV-1 Neutralizing Antibodies. *Vaccines (Basel)* **8**, (2020).
- 839  
840 62. Mascola JR, *et al.* Recommendations for the design and use of standard virus panels to  
841 assess neutralizing antibody responses elicited by candidate human immunodeficiency  
842 virus type 1 vaccines. *J Virol* **79**, 10103-10107 (2005).
- 843  
844 63. Mishra N, *et al.* Broadly neutralizing plasma antibodies effective against autologous  
845 circulating viruses in infants with multivariant HIV-1 infection. *Nat Commun* **11**, 4409  
846 (2020).
- 847  
848 64. Metsalu T, Vilo J. ClustVis: a web tool for visualizing clustering of multivariate data using  
849 Principal Component Analysis and heatmap. *Nucleic Acids Res* **43**, W566-570 (2015).
- 850  
851 65. Firth HV, *et al.* DECIPHER: Database of Chromosomal Imbalance and Phenotype in  
852 Humans Using Ensembl Resources. *Am J Hum Genet* **84**, 524-533 (2009).
- 853  
854 66. R, Core, Team. R: A language and environment for statistical computing. (2017).
- 855  
856 67. Wickham H. *ggplot2: Elegant Graphics for Data Analysis*. Springer-Verlag (2016).
- 857  
858 68. Mellors JW, *et al.* Plasma viral load and CD4+ lymphocytes as prognostic markers of HIV-  
859 1 infection. *Ann Intern Med* **126**, 946-954 (1997).
- 860  
861 69. Walker LM, *et al.* Broad neutralization coverage of HIV by multiple highly potent  
862 antibodies. *Nature* **477**, 466-470 (2011).
- 863  
864 70. Trkola A, *et al.* Human monoclonal antibody 2G12 defines a distinctive neutralization  
865 epitope on the gp120 glycoprotein of human immunodeficiency virus type 1. *J Virol* **70**,  
866 1100-1108 (1996).
- 867

- 868 71. Brunel FM, *et al.* Structure-function analysis of the epitope for 4E10, a broadly  
869 neutralizing human immunodeficiency virus type 1 antibody. *J Virol* **80**, 1680-1687  
870 (2006).
- 871
- 872 72. Barroso H, *et al.* Evolutionary and structural features of the C2, V3 and C3 envelope  
873 regions underlying the differences in HIV-1 and HIV-2 biology and infection. *PLoS One* **6**,  
874 e14548 (2011).
- 875
- 876 73. Mabvakure BM, *et al.* Positive Selection at Key Residues in the HIV Envelope  
877 Distinguishes Broad and Strain-Specific Plasma Neutralizing Antibodies. *J Virol* **93**,  
878 (2019).
- 879
- 880 74. Dingens AS, Arenz D, Weight H, Overbaugh J, Bloom JD. An Antigenic Atlas of HIV-1  
881 Escape from Broadly Neutralizing Antibodies Distinguishes Functional and Structural  
882 Epitopes. *Immunity* **50**, 520-532 e523 (2019).
- 883
- 884 75. Landais E, Moore PL. Development of broadly neutralizing antibodies in HIV-1 infected  
885 elite neutralizers. *Retrovirology* **15**, 61 (2018).
- 886
- 887 76. Bricault CA, *et al.* HIV-1 Neutralizing Antibody Signatures and Application to Epitope-  
888 Targeted Vaccine Design. *Cell Host Microbe* **26**, 296 (2019).
- 889
- 890 77. Local, Burden, of, Disease, HIV, Collaborators. Subnational mapping of HIV incidence and  
891 mortality among individuals aged 15-49 years in sub-Saharan Africa, 2000-18: a  
892 modelling study. *Lancet HIV* **8**, e363-e375 (2021).
- 893
- 894 78. Sebastiao CS, Morais J, Brito M. Factors Influencing HIV Drug Resistance among Pregnant  
895 Women in Luanda, Angola: Findings from a Cross-Sectional Study. *Trop Med Infect Dis*  
896 **6**, (2021).
- 897
- 898 79. Gray ES, *et al.* The neutralization breadth of HIV-1 develops incrementally over four  
899 years and is associated with CD4+ T cell decline and high viral load during acute  
900 infection. *J Virol* **85**, 4828-4840 (2011).
- 901
- 902 80. Moore PL. The Neutralizing Antibody Response to the HIV-1 Env Protein. *Curr HIV Res*  
903 **16**, 21-28 (2018).
- 904
- 905 81. Bhiman JN, *et al.* Viral variants that initiate and drive maturation of V1V2-directed HIV-  
906 1 broadly neutralizing antibodies. *Nat Med* **21**, 1332-1336 (2015).
- 907
- 908 82. Liao HX, *et al.* Co-evolution of a broadly neutralizing HIV-1 antibody and founder virus.  
909 *Nature* **496**, 469-476 (2013).
- 910

- 911 83. Doria-Rose NA, *et al.* Developmental pathway for potent V1V2-directed HIV-neutralizing  
912 antibodies. *Nature* **509**, 55-62 (2014).
- 913
- 914 84. Ndlovu B, *et al.* Envelope characteristics in individuals who developed neutralizing  
915 antibodies targeting different epitopes in HIV-1 subtype C infection. *Virology* **546**, 1-12  
916 (2020).
- 917
- 918 85. Beirnaert E, *et al.* Identification and characterization of sera from HIV-infected  
919 individuals with broad cross-neutralizing activity against group M (env clade A-H) and  
920 group O primary HIV-1 isolates. *J Med Virol* **62**, 14-24 (2000).
- 921
- 922 86. Kouyos RD, *et al.* Tracing HIV-1 strains that imprint broadly neutralizing antibody  
923 responses. *Nature* **561**, 406-410 (2018).
- 924
- 925 87. Sather DN, *et al.* Factors associated with the development of cross-reactive neutralizing  
926 antibodies during human immunodeficiency virus type 1 infection. *J Virol* **83**, 757-769  
927 (2009).
- 928
- 929 88. Moir S, Fauci AS. B-cell responses to HIV infection. *Immunol Rev* **275**, 33-48 (2017).
- 930
- 931 89. Badura R, *et al.* Early ART in Acute HIV-1 Infection: Impact on the B-Cell Compartment.  
932 *Front Cell Infect Microbiol* **10**, 347 (2020).
- 933
- 934 90. Moir S, *et al.* B cells in early and chronic HIV infection: evidence for preservation of  
935 immune function associated with early initiation of antiretroviral therapy. *Blood* **116**,  
936 5571-5579 (2010).
- 937
- 938 91. Gach JS, *et al.* HIV-1 specific antibody titers and neutralization among chronically  
939 infected patients on long-term suppressive antiretroviral therapy (ART): a cross-  
940 sectional study. *PLoS One* **9**, e85371 (2014).
- 941
- 942 92. Kong R, *et al.* Broad and potent neutralizing antibody responses elicited in natural HIV-  
943 2 infection. *J Virol* **86**, 947-960 (2012).
- 944
- 945 93. Rodriguez SK, *et al.* Comparison of heterologous neutralizing antibody responses of  
946 human immunodeficiency virus type 1 (HIV-1)- and HIV-2-infected Senegalese patients:  
947 distinct patterns of breadth and magnitude distinguish HIV-1 and HIV-2 infections. *J Virol*  
948 **81**, 5331-5338 (2007).
- 949
- 950 94. Rocha C, *et al.* Potency of HIV-2-specific antibodies increase in direct association with  
951 loss of memory B cells. *AIDS* **31**, 2431-2433 (2017).
- 952

- 953 95. Bai H, Li Y, Michael NL, Robb ML, Rolland M. The breadth of HIV-1 neutralizing antibodies  
954 depends on the conservation of key sites in their epitopes. *PLoS Comput Biol* **15**,  
955 e1007056 (2019).
- 956  
957 96. Rademeyer C, *et al.* Genetic characteristics of HIV-1 subtype C envelopes inducing cross-  
958 neutralizing antibodies. *Virology* **368**, 172-181 (2007).
- 959  
960 97. Kumar S, *et al.* An HIV-1 Broadly Neutralizing Antibody from a Clade C-Infected Pediatric  
961 Elite Neutralizer Potently Neutralizes the Contemporaneous and Autologous Evolving  
962 Viruses. *J Virol* **93**, (2019).
- 963  
964 98. Cheedarla N, *et al.* Evolution of Neutralization Response in HIV-1 Subtype C-Infected  
965 Individuals Exhibiting Broad Cross-Clade Neutralization of HIV-1 Strains. *Front Immunol*  
966 **9**, 618 (2018).
- 967  
968 99. Lei L, *et al.* The HIV-1 Envelope Glycoprotein C3/V4 Region Defines a Prevalent  
969 Neutralization Epitope following Immunization. *Cell Rep* **27**, 586-598 e586 (2019).
- 970  
971
